# Supplementary material for: Ammonium iodide-catalyzed radical-mediated tandem cyclization of aromatic aldehydes, arylamines and 1,4-dioxane
Source: Royal Society of Chemistry journal article supplement (doi:10.1039/d1nj05082f), 2021-12-07

## Supporting information for

### Ammonium Iodide-Catalyzed Radical-mediated Tandem Cyclization of Aromatic Aldehydes, Arylamines and 1,4-Dioxane

Yunfeng Liao,<sup>\*a</sup> Yiyan Yan,<sup>b</sup> Hongrui Qi,<sup>b</sup> Weijie Zhang,<sup>a</sup> Yanjun Xie,<sup>a</sup> Qiang Tiao,<sup>a</sup> Jiyong  
Deng,<sup>\*a</sup> and Bing Yi<sup>\*a</sup>

<sup>a</sup> Hunan Provincial Key Laboratory of Environmental Catalysis & Waste Recycling, College of Materials and Chemical Engineering, Hunan Institute of Engineering, Xiangtan, 411104, China; Email: liaoyunfeng900@126.com; djyong@yeah.net; bingyi2004@126.com.

<sup>b</sup> Key Laboratory for Green Organic Synthesis and Application of Hunan Province, Key Laboratory of Environmentally Friendly Chemistry and Application of Ministry of Education, College of Chemistry, Xiangtan University, Xiangtan 411105, China.

#### Table of Contents

|                                                                                  |              |
|----------------------------------------------------------------------------------|--------------|
| <b>1. General information</b>                                                    | <b>2</b>     |
| <b>2. General procedure for preparation 4a-4v</b>                                | <b>2</b>     |
| <b>3. Characterization data of products</b>                                      | <b>2-10</b>  |
| <b>4. References</b>                                                             | <b>10</b>    |
| <b>5. Copies of <sup>1</sup>H and <sup>13</sup>C NMR spectra of all products</b> | <b>11-32</b> |

### General information:

All reactions were performed under an atmosphere of air unless otherwise stated. Column chromatography was undertaken using silica gel (200-300 mesh).  $^1\text{H}$  NMR and  $^{13}\text{C}$  NMR spectra were registered on Bruker-AV (400 and 100 MHz, respectively) apparatus internal reference to tetramethylsilane (TMS) or chloroform signals. Mass spectra were recorded on Bruker 15T HRMS instrument (maldi). The new compounds were characterized by  $^1\text{H}$  NMR,  $^{13}\text{C}$  NMR, MS and HRMS. The structure of known compounds was further corroborated by comparing their  $^1\text{H}$  NMR,  $^{13}\text{C}$  NMR data and MS data with those of literature. Melting points were measured with a YUHUA X-5 melting point instrument and were non-calibrated. All reagents were purchased from commercial suppliers and used without additional refinement.

### General procedure for preparation 4a-4v:

In a 10 mL tube was added ammonium iodide (0.04 mmol), benzaldehyde (0.2 mmol), aniline (0.4 mmol), dicumyl peroxide (0.6 mmol). Then, 1,4-dioxane (2.0 mL) was added to the tube by syringe and the tube was sealed. The reaction vessel was stirred in an oil bath at 130 °C for 16 h. The mixture was cooled to room temperature and concentrated under reduced pressure. The residue was purified by column chromatography on silica gel (petroleum ether/EtOAc : 1:1 to 10:1) to give the corresponding compounds.

### 2-((2-phenylquinolin-3-yl)oxy)ethan-1-ol (4a)

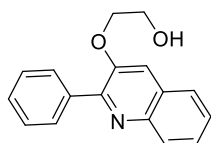

Yellow oily liquid (33.3 mg, 63% yield);  $^1\text{H}$  NMR (400 MHz,  $\text{CDCl}_3$ , ppm)  $\delta$  8.11 (d,  $J = 8.4$  Hz, 1H), 7.96-7.93 (m, 2H), 7.75 (d,  $J = 8.0$  Hz, 1H), 7.61-7.57 (m, 1H), 7.53-7.42 (m, 5H), 4.23 (t,  $J = 4.4$  Hz, 2H), 3.98 (m, 2H);  $^{13}\text{C}$  NMR (100 MHz,  $\text{CDCl}_3$ , ppm)  $\delta$  152.1, 150.5, 143.2, 137.7, 129.6, 129.2, 128.8, 128.5, 128.1, 127.2, 126.9, 126.2, 114.4, 69.9, 61.0; HRMS (maldi, m/z): calcd. for  $\text{C}_{17}\text{H}_{15}\text{NNaO}_2$   $[\text{M}+\text{Na}]^+$  288.1000, found 288.0989.

### 2-((2-(p-tolyl)quinolin-3-yl)oxy)ethan-1-ol (4b)

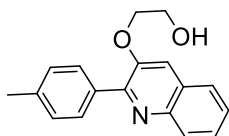

Brown oily liquid (30.6 mg, 55%);  $^1\text{H}$  NMR (400 MHz,  $\text{CDCl}_3$ , ppm)  $\delta$  8.12 (d,  $J = 8.4$  Hz, 1H), 7.86 (d,  $J = 8.0$  Hz, 2H), 7.74 (d,  $J = 7.6$  Hz, 1H), 7.61-7.56 (m, 1H), 7.52-7.49 (m, 2H), 7.30 (d,  $J = 8.0$  Hz, 2H), 4.24 (t,  $J = 4.6$  Hz, 2H), 4.00 (t,  $J = 4.0$  Hz, 2H), 2.43 (s, 3H);  $^{13}\text{C}$  NMR (100 MHz,  $\text{CDCl}_3$ , ppm)  $\delta$  152.1, 150.5, 143.3, 138.8, 134.8, 129.5, 129.2, 128.8, 128.4, 127.1, 126.7, 126.2, 114.4, 69.9, 61.1, 21.3; HRMS (maldi,  $m/z$ ): calcd. for  $\text{C}_{18}\text{H}_{18}\text{NO}_2$   $[\text{M}+\text{H}]^+$  280.1338, found 280.1350.

**2-((2-(4-methoxyphenyl)quinolin-3-yl)oxy)ethan-1-ol (4c)**

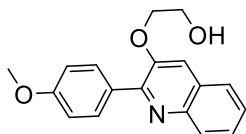

Brown oily liquid (17.6 mg, 30%);  $^1\text{H}$  NMR (400 MHz,  $\text{CDCl}_3$ , ppm)  $\delta$  8.09 (d,  $J = 8.4$  Hz, 1H), 7.97-7.95 (m, 2H), 7.73 (d,  $J = 7.6$  Hz, 1H), 7.59-7.55 (m, 1H), 7.51-7.47 (m, 2H), 7.01 (d,  $J = 8.8$  Hz, 2H), 4.22 (t,  $J = 4.4$  Hz, 2H), 4.00 (t,  $J = 4.6$  Hz, 2H), 3.87 (s, 3H);  $^{13}\text{C}$  NMR (100 MHz,  $\text{CDCl}_3$ , ppm)  $\delta$  160.2, 151.6, 150.5, 143.3, 131.1, 130.2, 129.1, 128.2, 127.1, 126.6, 126.2, 114.4, 113.5, 69.9, 61.1, 55.3; HRMS (maldi,  $m/z$ ): calcd. for  $\text{C}_{18}\text{H}_{18}\text{NO}_3$   $[\text{M}+\text{H}]^+$  296.1287, found 296.1285.

**2-((2-(4-fluorophenyl)quinolin-3-yl)oxy)ethan-1-ol (4d)**

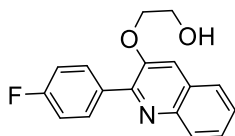

Red solid (20.1 mg, 35%); melting point (m.p.): 123.0-124.5  $^{\circ}\text{C}$ ;  $^1\text{H}$  NMR (400 MHz,  $\text{CDCl}_3$ , ppm)  $\delta$  8.09 (d,  $J = 8.4$  Hz, 1H), 7.99-7.95 (m, 2H), 7.73 (d,  $J = 8.0$  Hz, 1H), 7.61-7.57 (m, 1H), 7.53-7.49 (m, 2H), 7.17-7.13 (m, 2H), 4.22 (t,  $J = 4.6$  Hz, 2H), 3.99 (t,  $J = 4.4$  Hz, 2H);  $^{13}\text{C}$  NMR (100 MHz,  $\text{CDCl}_3$ , ppm)  $\delta$  162.9 (d,  $J = 247.1$  Hz), 150.8, 150.4, 143.2, 133.7 (d,  $J = 3.1$  Hz), 131.6 (d,  $J = 8.2$  Hz), 129.2, 128.4, 127.3, 127.0, 126.2, 115.0 (d,  $J = 22.8$  Hz), 114.5, 69.9, 61.1; HRMS (maldi,  $m/z$ ): calcd. for  $\text{C}_{17}\text{H}_{15}\text{FNO}_2$   $[\text{M}+\text{H}]^+$  284.1087, found 284.1087.

**2-((2-(4-chlorophenyl)quinolin-3-yl)oxy)ethan-1-ol (4e)**

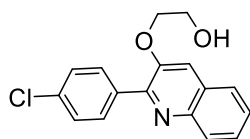

Brown oily liquid (25.7 mg, 43%);  $^1\text{H}$  NMR (400 MHz,  $\text{CDCl}_3$ , ppm)  $\delta$  8.09 (d,  $J = 8.4$  Hz, 1H), 7.93 (d,  $J = 8.4$  Hz, 2H), 7.74 (d,  $J = 8.0$  Hz, 1H), 7.61-7.57 (m, 1H), 7.54-7.49 (m, 2H), 7.46-7.42 (m, 2H), 4.23 (t,  $J = 4.4$  Hz, 2H), 4.00 (t,  $J = 4.4$  Hz, 2H);  $^{13}\text{C}$  NMR (100 MHz,  $\text{CDCl}_3$ , ppm)  $\delta$  150.6, 150.4, 143.2, 136.1, 134.9, 131.0, 129.2, 128.5, 128.2, 127.3, 127.1, 126.2, 114.5, 69.9, 61.0; HRMS (maldi,  $m/z$ ): calcd. for  $\text{C}_{17}\text{H}_{14}\text{ClNaO}_2$   $[\text{M}+\text{Na}]^+$  322.0611, found 322.0612.

**2-((2-(4-bromophenyl)quinolin-3-yl)oxy)ethan-1-ol (4f)**

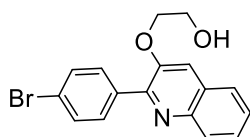

Brown oily liquid (21.0 mg, 31%);  $^1\text{H}$  NMR (400 MHz,  $\text{CDCl}_3$ , ppm)  $\delta$  8.08 (d,  $J = 8.4$  Hz, 1H), 7.85 (d,  $J = 8.4$  Hz, 2H), 7.74 (d,  $J = 8.0$  Hz, 1H), 7.60-7.57 (m, 3H), 7.54-7.50 (m, 2H), 4.22 (t,  $J = 4.6$  Hz, 2H), 3.99 (t,  $J = 4.4$  Hz, 2H);  $^{13}\text{C}$  NMR (100 MHz,  $\text{CDCl}_3$ , ppm)  $\delta$  150.6, 150.4, 143.2, 136.6, 131.3, 131.2, 129.2, 128.5, 127.3, 127.1, 126.3, 123.3, 114.5, 69.9, 61.0; HRMS (maldi,  $m/z$ ): calcd. for  $\text{C}_{17}\text{H}_{15}\text{BrNO}_2$   $[\text{M}+\text{H}]^+$  344.0286, found 344.0286.

**2-((2-(m-tolyl)quinolin-3-yl)oxy)ethan-1-ol (4g)**

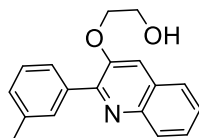

Brown oily liquid (27.4 mg, 43%);  $^1\text{H}$  NMR (400 MHz,  $\text{CDCl}_3$ , ppm)  $\delta$  8.12 (d,  $J = 8.4$  Hz, 1H), 7.51-7.71 (m, 3H), 7.61-7.57 (m, 1H), 7.53-7.49 (m, 2H), 7.36 (t,  $J = 7.6$  Hz, 2H), 7.25 (s, 1H), 4.22 (t,  $J = 4.6$  Hz, 2H), 3.98 (t,  $J = 4.6$  Hz, 2H), 2.45 (s, 3H);  $^{13}\text{C}$  NMR (100 MHz,  $\text{CDCl}_3$ , ppm)  $\delta$  152.4, 150.5, 143.3, 137.8, 137.6, 130.2, 129.6, 129.3, 128.4, 127.8, 127.1, 126.8, 126.6, 126.2, 114.5, 69.9, 61.1, 21.5; HRMS (maldi,  $m/z$ ): calcd. for  $\text{C}_{18}\text{H}_{17}\text{NaNO}_2$   $[\text{M}+\text{Na}]^+$  302.1157, found 302.1154.

**2-((2-(o-tolyl)quinolin-3-yl)oxy)ethan-1-ol (4h)**

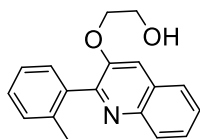

Brown oily liquid (21.0 mg, 38%);  $^1\text{H NMR}$  (400 MHz,  $\text{CDCl}_3$ , ppm)  $\delta$  8.10 (d,  $J = 8.4$  Hz, 1H), 7.78 (dd,  $J = 1.2, 8.4$  Hz, 1H), 7.62-7.53 (m, 3H), 7.38-7.29 (m, 4H), 4.16 (t,  $J = 4.6$  Hz, 2H), 3.84 (t,  $J = 4.4$  Hz, 2H), 2.20 (s, 3H);  $^{13}\text{C NMR}$  (100 MHz,  $\text{CDCl}_3$ , ppm)  $\delta$  154.1, 150.5, 143.1, 137.6, 136.4, 130.1, 129.2, 129.2, 128.6, 128.5, 127.2, 127.0, 126.3, 125.6, 114.1, 69.9, 60.9, 19.6; HRMS (maldi,  $m/z$ ): calcd. for  $\text{C}_{18}\text{H}_{18}\text{NO}_2$   $[\text{M}+\text{H}]^+$  280.1338, found 280.1344.

**2-((2-(3,4-dimethylphenyl)quinolin-3-yl)oxy)ethan-1-ol (4i)**

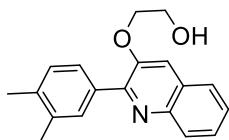

Yellow oil (19.5 mg, 33%);  $^1\text{H NMR}$  (400 MHz,  $\text{CDCl}_3$ , ppm)  $\delta$  8.11 (d,  $J = 8.0$  Hz, 1H), 7.73-7.71 (m, 2H), 7.69-7.66 (m, 1H), 7.59-7.55 (m, 1H), 7.51-7.46 (m, 2H), 7.22 (d,  $J = 8.0$  Hz, 1H), 4.20 (t,  $J = 4.4$  Hz, 2H), 3.97 (t,  $J = 4.6$  Hz, 2H), 2.34 (s, 3H), 2.32 (s, 3H);  $^{13}\text{C NMR}$  (100 MHz,  $\text{CDCl}_3$ , ppm)  $\delta$  152.3, 150.6, 143.3, 137.5, 136.4, 135.2, 130.7, 129.2, 129.2, 128.3, 127.1, 127.0, 126.7, 126.2, 114.4, 69.9, 61.1, 19.9, 19.7; HRMS (maldi,  $m/z$ ): calcd. for  $\text{C}_{19}\text{H}_{20}\text{NO}_2$   $[\text{M}+\text{H}]^+$  294.1494, found 294.1496.

**2-((2-(3-chlorophenyl)quinolin-3-yl)oxy)ethan-1-ol (4j)**

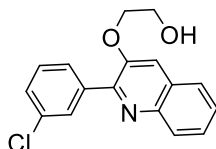

Yellow solid (24.1 mg, 40%). melting point (m.p.): 137.0-139.8  $^{\circ}\text{C}$ ;  $^1\text{H NMR}$  (400 MHz,  $\text{CDCl}_3$ , ppm)  $\delta$  8.10 (d,  $J = 8.4$  Hz, 1H), 7.99 (s, 1H), 7.88-7.85 (m, 1H), 7.75 (d,  $J = 8.0$  Hz, 1H), 7.62-7.58 (m, 1H), 7.54-7.51 (m, 2H), 7.41-7.40 (m, 2H), 4.24 (t,  $J = 4.4$  Hz, 2H), 4.01 (t,  $J = 4.6$  Hz, 2H);  $^{13}\text{C NMR}$  (100 MHz,  $\text{CDCl}_3$ , ppm)  $\delta$  150.4, 150.3, 143.2, 139.4, 134.0, 129.8, 129.3, 129.3, 128.8, 128.6, 127.8, 127.4, 127.2, 126.2, 114.6, 69.9, 61.1; HRMS (maldi,  $m/z$ ): calcd. for

C<sub>17</sub>H<sub>15</sub>ClNaNO<sub>2</sub> [M+Na]<sup>+</sup> 322.0611, found 322.0610.

**2-([2,2'-biquinolin]-3-yloxy)ethan-1-ol (4k)**<sup>[1]</sup>

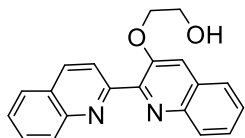

Brown oily liquid (31.0 mg, 49%); <sup>1</sup>H NMR (400 MHz, CDCl<sub>3</sub>, ppm) δ 8.33 (d, *J* = 8.8, 1H), 8.25 (d, *J* = 8.4 Hz, 1H), 8.17-8.12 (m, 2H), 7.85 (d, *J* = 8.4 Hz, 1H), 7.76-7.72 (m, 2H), 7.68 (s, 1H), 7.62-7.51 (m, 3H), 6.53 (brs, 1H), 4.45 (t, *J* = 4.2 Hz, 2H), 3.97 (t, *J* = 4.2 Hz, 2H); <sup>13</sup>C NMR (100 MHz, CDCl<sub>3</sub>, ppm) δ 156.3, 151.7, 150.7, 146.8, 143.4, 137.3, 130.0, 129.4, 129.2, 128.7, 127.7, 127.6, 127.6, 127.5, 127.1, 126.3, 122.5, 118.8, 73.1, 60.6; HRMS (maldi, m/z): calcd. for C<sub>20</sub>H<sub>17</sub>N<sub>2</sub>O<sub>2</sub> [M+H]<sup>+</sup> 317.1290, found 317.1293.

**2-((2-(quinoxalin-2-yl)quinolin-3-yl)oxy)ethan-1-ol (4l)**<sup>[1]</sup>

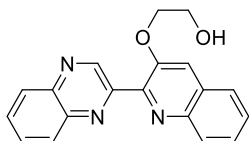

Yellow solid (18.8 mg, 30%), melting point (mp): 84.0-87.0 °C; <sup>1</sup>H NMR (400 MHz, CDCl<sub>3</sub>, ppm) δ 9.69 (s, 1H), 8.25-8.18 (m, 3H), 7.85-7.81 (m, 3H), 7.75 (s, 1H), 7.69-7.59 (m, 2H), 4.50 (t, *J* = 4.4 Hz, 2H), 4.03 (t, *J* = 4.4 Hz, 2H); <sup>13</sup>C NMR (100 MHz, CDCl<sub>3</sub>, ppm) δ 152.2, 150.6, 147.9, 146.8, 143.6, 142.0, 140.7, 130.6, 129.8, 129.4, 129.3, 129.1, 128.2, 127.9, 126.4, 118.4, 72.6, 60.9; HRMS (maldi, m/z): calcd. for C<sub>19</sub>H<sub>15</sub>N<sub>3</sub>NaO<sub>2</sub> [M+Na]<sup>+</sup> 340.1062, found 340.1058.

**2-((6-methyl-2-phenylquinolin-3-yl)oxy)ethan-1-ol (4m)**

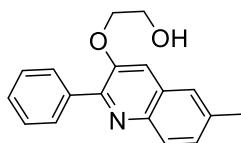

Brown oily liquid (34.8 mg, 62%); <sup>1</sup>H NMR (400 MHz, CDCl<sub>3</sub>, ppm) δ 8.01 (d, *J* = 8.4 Hz, 1H), 7.93 (t, *J* = 6.8 Hz, 2H), 7.52-7.41 (m, 6H), 4.22 (t, *J* = 4.4 Hz, 2H), 3.98 (t, *J* = 4.2 Hz, 2H), 2.54 (s, 3H); <sup>13</sup>C NMR (100 MHz, CDCl<sub>3</sub>, ppm) δ 151.1, 150.6, 141.9, 137.9, 136.8, 129.5, 129.4, 129.0, 128.7, 128.5, 128.1, 125.2, 114.0, 69.9, 61.1, 21.6; HRMS (maldi, m/z): calcd. for

C<sub>18</sub>H<sub>18</sub>NO<sub>2</sub> [M+H]<sup>+</sup> 280.1338, found 280.1342.

**2-((6-methoxy-2-phenylquinolin-3-yl)oxy)ethan-1-ol (4n)**

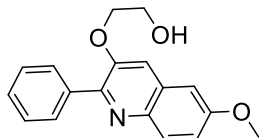

White solid (19.1 mg, 32%). melting point (m.p.): 161.6-162.8 °C; <sup>1</sup>H NMR (400 MHz, CDCl<sub>3</sub>, ppm) δ 8.00 (d, *J* = 9.2 Hz, 1H), 7.92 (d, *J* = 7.6 Hz, 2H), 7.50-7.40 (m, 4H), 7.24 (dd, *J* = 2.8, 9.2 Hz, 1H), 7.03 (d, *J* = 2.8 Hz, 1H), 4.21 (t, *J* = 4.4 Hz, 2H), 3.98 (t, *J* = 4.4 Hz, 2H), 3.94 (s, 3H); <sup>13</sup>C NMR (100 MHz, CDCl<sub>3</sub>, ppm) δ 158.3, 151.0, 149.4, 139.3, 137.9, 130.8, 129.7, 129.5, 128.5, 128.1, 119.5, 113.8, 104.3, 69.9, 61.2, 55.5; HRMS (maldi, *m/z*): calcd. for C<sub>18</sub>H<sub>18</sub>NO<sub>3</sub> [M+H]<sup>+</sup> 296.1287, found 296.1292.

**2-((6-fluoro-2-phenylquinolin-3-yl)oxy)ethan-1-ol (4o)**

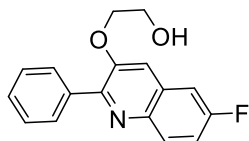

Brown solid (28.3 mg, 50%), melting point (m.p.): 181.0-182.2 °C; <sup>1</sup>H NMR (400 MHz, CDCl<sub>3</sub>, ppm) δ 8.11-8.08 (m, 1H), 7.93 (d, *J* = 6.8 Hz, 2H), 7.52-7.45 (m, 4H), 7.38-7.32 (m, 2H), 4.24 (t, *J* = 4.6 Hz, 2H), 4.01 (t, *J* = 4.4 Hz, 2H); <sup>13</sup>C NMR (100 MHz, CDCl<sub>3</sub>, ppm) δ 161.0 (d, *J* = 246.3 Hz), 151.2, 140.3, 137.5, 131.8 (d, *J* = 9.6 Hz), 129.5, 129.4 (d, *J* = 10.2 Hz), 128.9, 128.6, 128.1, 117.1 (d, *J* = 25.5 Hz), 113.7 (d, *J* = 5.1 Hz), 109.4 (d, *J* = 22.1 Hz), 70.0, 61.1; HRMS (maldi, *m/z*): calcd. for C<sub>17</sub>H<sub>15</sub>FNANO<sub>2</sub> [M+Na]<sup>+</sup> 306.0906, found 306.0915.

**2-((6-chloro-2-phenylquinolin-3-yl)oxy)ethan-1-ol (4p)**

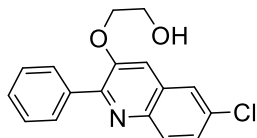

Yellow oily liquid (**21.5 mg**, 36%); <sup>1</sup>H NMR (400 MHz, CDCl<sub>3</sub>, ppm) δ 8.05 (d, *J* = 8.8 Hz, 1H), 7.94 (dd, *J* = 1.6 Hz, 8.4 Hz, 2H), 7.73 (d, *J* = 2.4 Hz, 1H), 7.53-7.46 (m, 4H), 7.43 (s, 1H), 4.24 (t, *J* = 4.4 Hz, 2H), 4.01 (t, *J* = 4.2 Hz, 2H); <sup>13</sup>C NMR (100 MHz, CDCl<sub>3</sub>, ppm) δ 152.4, 151.2, 141.7,

137.4, 132.7, 130.9, 129.6, 129.2, 129.0, 128.2, 128.0, 124.9, 113.3, 70.0, 61.1. HRMS (maldi, m/z): calcd. for  $C_{17}H_{15}ClNaNO_2$   $[M+Na]^+$  322.0611, found 322.0622.

**2-((6-bromo-2-phenylquinolin-3-yl)oxy)ethan-1-ol (4q)**

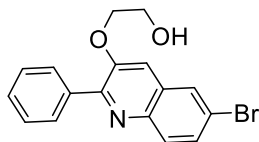

Brown oily liquid (20.6 mg, 30%);  $^1H$  NMR (400 MHz,  $CDCl_3$ , ppm)  $\delta$  7.97-7.93 (m, 3H), 7.90 (d,  $J = 2.0$ , 1H), 7.66-7.63 (m, 1H), 7.51-7.44 (m, 3H), 7.40 (s, 1H), 4.22 (t,  $J = 4.4$  Hz, 2H), 3.99 (t,  $J = 4.2$  Hz, 2H);  $^{13}C$  NMR (100 MHz,  $CDCl_3$ , ppm)  $\delta$  152.5, 151.1, 141.8, 137.4, 131.0, 130.6, 129.7, 129.5, 129.1, 128.2, 128.2, 120.9, 113.1, 70.0, 61.0; HRMS (maldi, m/z): calcd. for  $C_{17}H_{15}BrNO_2$   $[M+H]^+$  344.0286, found 344.0292.

**2-((6-iodo-2-phenylquinolin-3-yl)oxy)ethan-1-ol (4r)**

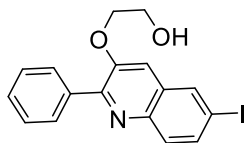

Brown oily liquid (18.6 mg, 24%);  $^1H$  NMR (400 MHz,  $CDCl_3$ , ppm)  $\delta$  8.13 (s, 1H), 7.95-7.93 (m, 2H), 7.82 (m, 2H), 7.51-7.45 (m, 3H), 7.38 (s, 1H), 4.21 (t,  $J = 4.4$  Hz, 2H), 3.99 (t,  $J = 4.4$  Hz, 2H);  $^{13}C$  NMR (100 MHz,  $CDCl_3$ , ppm)  $\delta$  152.7, 150.9, 142.2, 137.4, 135.9, 134.9, 131.0, 130.2, 129.6, 129.1, 128.2, 112.9, 92.6, 70.0, 61.1; HRMS (maldi, m/z): calcd. for  $C_{17}H_{15}INO_2$   $[M+H]^+$  392.0147, found 392.0160.

**2-((7-methyl-2-phenylquinolin-3-yl)oxy)ethan-1-ol (4s)**

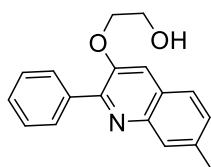

Brown oily liquid (22.6 mg, 41%);  $^1H$  NMR (400 MHz,  $CDCl_3$ , ppm)  $\delta$  7.93-7.90 (m, 3H), 7.61 (d,  $J = 8.0$  Hz, 1H), 7.48-7.41 (m, 4H), 7.35-7.33 (m, 1H), 4.16 (t,  $J = 4.6$  Hz, 2H), 3.93 (t,  $J = 4.6$  Hz, 2H), 2.53 (s, 3H);  $^{13}C$  NMR (100 MHz,  $CDCl_3$ , ppm)  $\delta$  151.8, 150.0, 143.4, 137.8, 137.2, 129.6,



129.1, 128.7, 128.2, 128.0, 126.3, 125.8, 114.5, 69.9, 60.9, 21.6; HRMS (maldi, m/z): calcd. for  $C_{18}H_{18}NO_2$   $[M+H]^+$  280.1338, found 280.1336.

**2-((6,8-dimethyl-2-phenylquinolin-3-yl)oxy)ethan-1-ol (4t)**

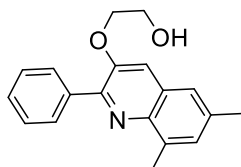

Yellow oily liquid (20.6 mg, 35%);  $^1H$  NMR (400 MHz,  $CDCl_3$ , ppm)  $\delta$  8.08 (d,  $J = 7.2$  Hz, 2H), 7.50-7.42 (m, 4H), 7.35 (s, 1H), 7.28 (s, 1H), 4.22 (t,  $J = 4.6$  Hz, 2H), 4.00 (t,  $J = 4.2$  Hz, 2H), 2.79 (s, 3H), 2.49 (s, 3H);  $^{13}C$  NMR (100 MHz,  $CDCl_3$ , ppm)  $\delta$  150.6, 149.0, 141.0, 138.3, 137.1, 136.6, 129.8, 129.7, 128.6, 128.0, 123.1, 114.4, 69.9, 61.2, 21.6, 17.8; HRMS (maldi, m/z): calcd. for  $C_{19}H_{20}NO_2$   $[M+H]^+$  294.1494, found 294.1496.

**2-((2,6-diphenylquinolin-3-yl)oxy)ethan-1-ol (4u)**

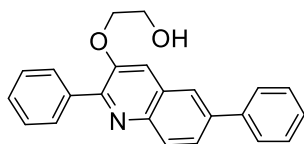

Yellow liquid (17.4 mg, 26%);  $^1H$  NMR (400 MHz,  $CDCl_3$ , ppm)  $\delta$  8.18 (d,  $J = 8.8$  Hz, 1H), 7.97 (t,  $J = 7.4$  Hz, 3H), 7.86 (dd,  $J = 2.0, 8.4$  Hz, 1H), 7.74 (d,  $J = 7.6$  Hz, 2H), 7.56 (s, 1H), 7.53-7.39 (m, 6H), 4.27 (t,  $J = 4.6$  Hz, 2H), 4.02 (d,  $J = 4.4$  Hz, 2H);  $^{13}C$  NMR (100 MHz,  $CDCl_3$ , ppm)  $\delta$  152.0, 150.9, 142.7, 140.5, 139.6, 137.7, 129.7, 129.6, 128.9, 128.9, 128.7, 128.1, 127.7, 127.4, 126.9, 124.0, 114.6, 70.0, 61.1; HRMS (maldi, m/z): calcd. for  $C_{23}H_{19}NNaO_2$   $[M+Na]^+$  364.1313, found 364.1330

**2-((2-phenylbenzo[g]quinolin-3-yl)oxy)ethan-1-ol (4v)**

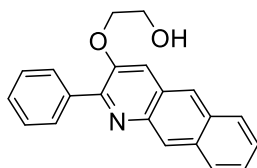

Red solid (29.4 mg, 47%). melting point (m.p.): 64.0-66.0 °C; <sup>1</sup>H NMR (400 MHz, CDCl<sub>3</sub>, ppm) δ 8.58 (d, *J* = 8.0 Hz, 1H), 8.40 (s, 1H), 8.06-8.03 (m, 3H), 7.96 (d, *J* = 7.6 Hz, 1H), 7.89 (d, *J* = 8.8 Hz, 1H), 7.72-7.64 (m, 2H), 7.54-7.44 (m, 3H), 4.37 (t, *J* = 4.6 Hz, 2H), 4.05 (m, 2H); <sup>13</sup>C NMR (100 MHz, CDCl<sub>3</sub>, ppm) δ 151.1, 150.4, 142.6, 137.7, 132.0, 129.6, 129.1, 128.8, 128.5, 128.2, 128.1, 127.2, 126.6, 125.5, 122.7, 112.1, 70.5, 61.3; HRMS (maldi, *m/z*): calcd. for C<sub>21</sub>H<sub>18</sub>NO<sub>2</sub> [M+H]<sup>+</sup> 316.1338, found 316.1350.

## References

[1] H. Qi, Y. Yan, Y. Liao, F. Jiang, H. Gao, and G.-J. Deng, I<sub>2</sub>-Catalyzed Oxidative Dehydrogenative Tandem Cyclization of 2-Methylquinolines, Arylamines and 1,4-Dioxane. *Org. Chem. Front.*, 2021, 8, 6108–6113.

# $^1\text{H}$ NMR and $^{13}\text{C}$ NMR spectra

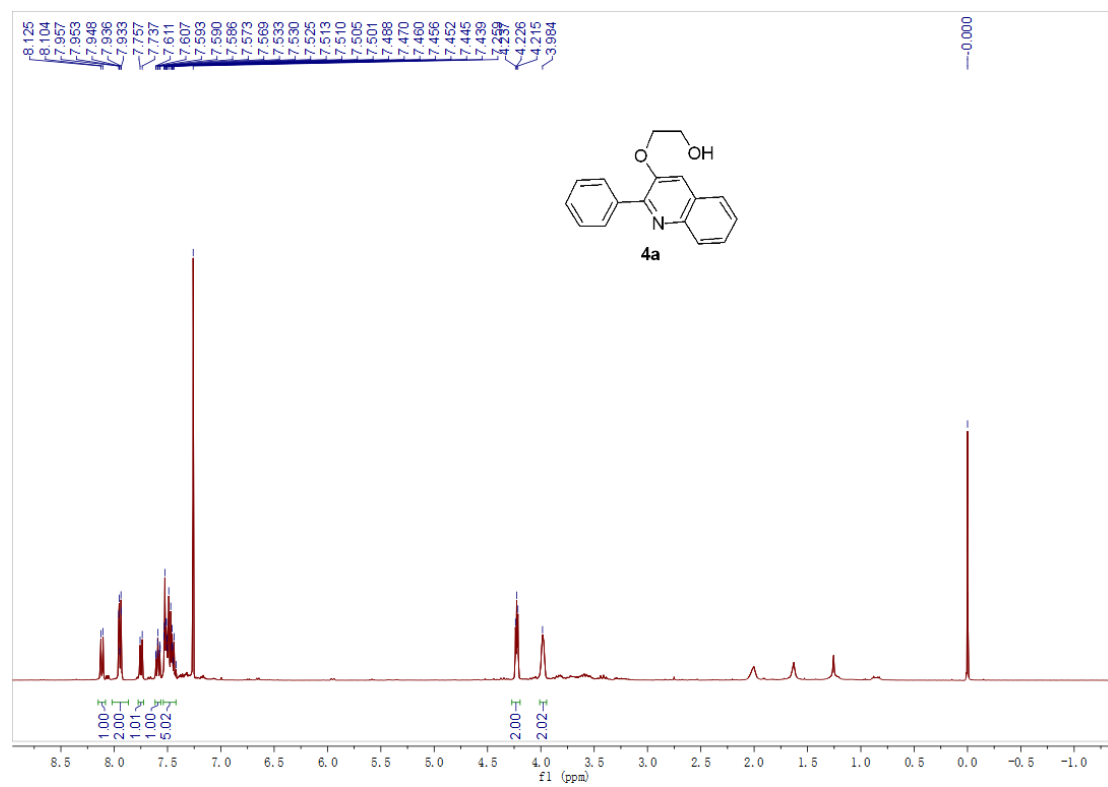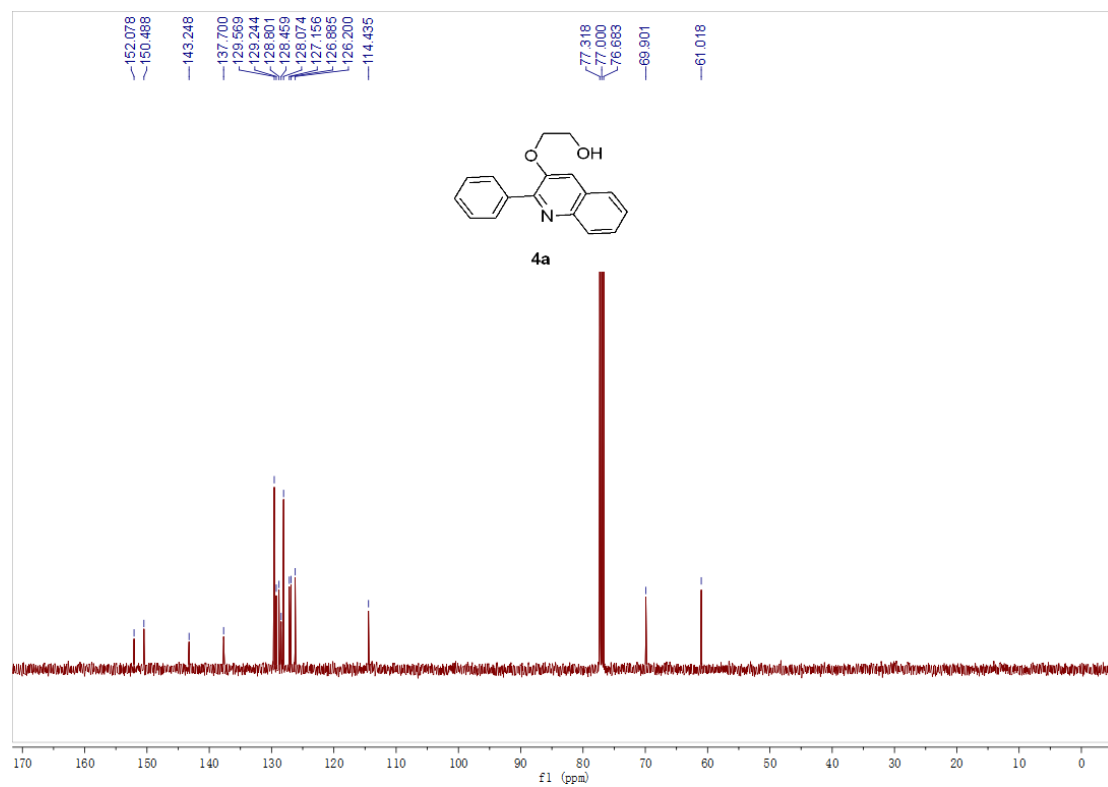

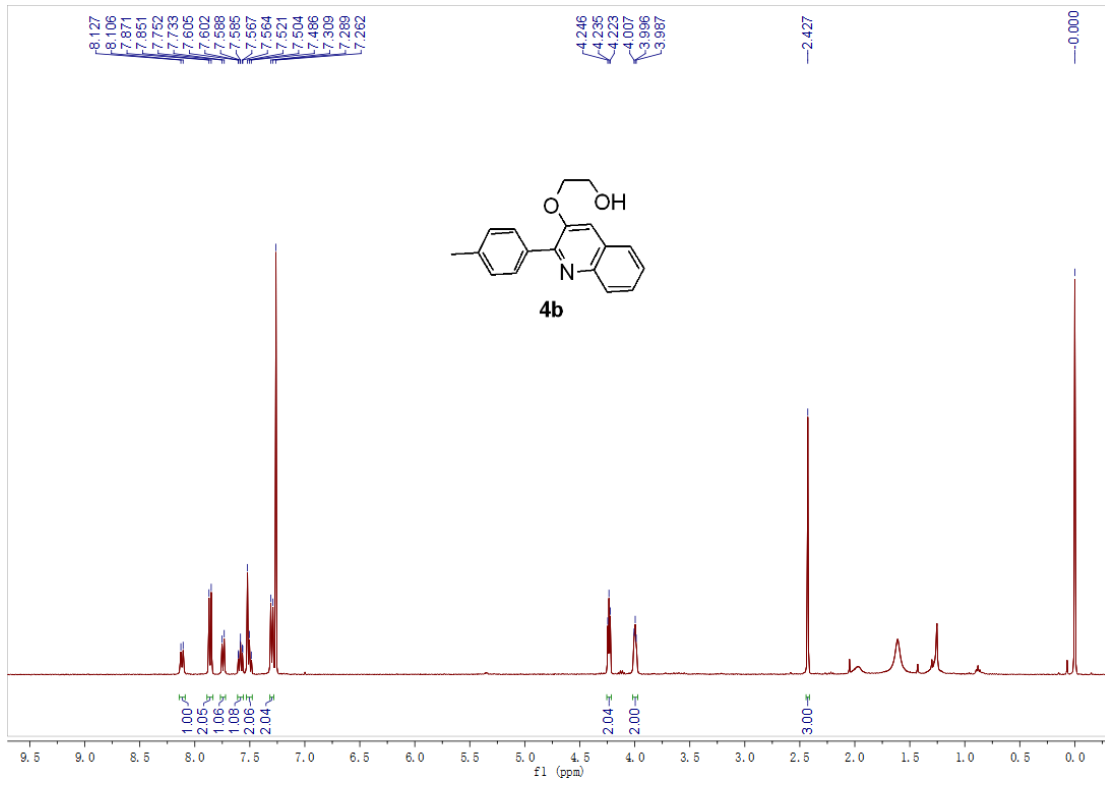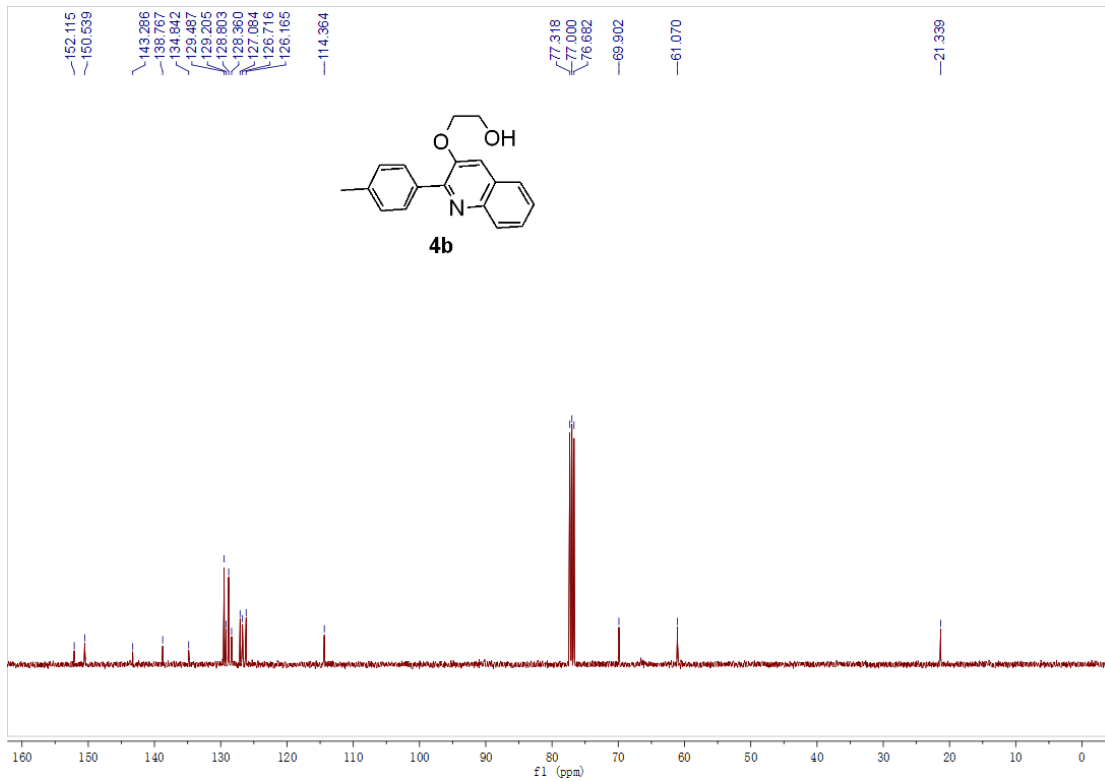

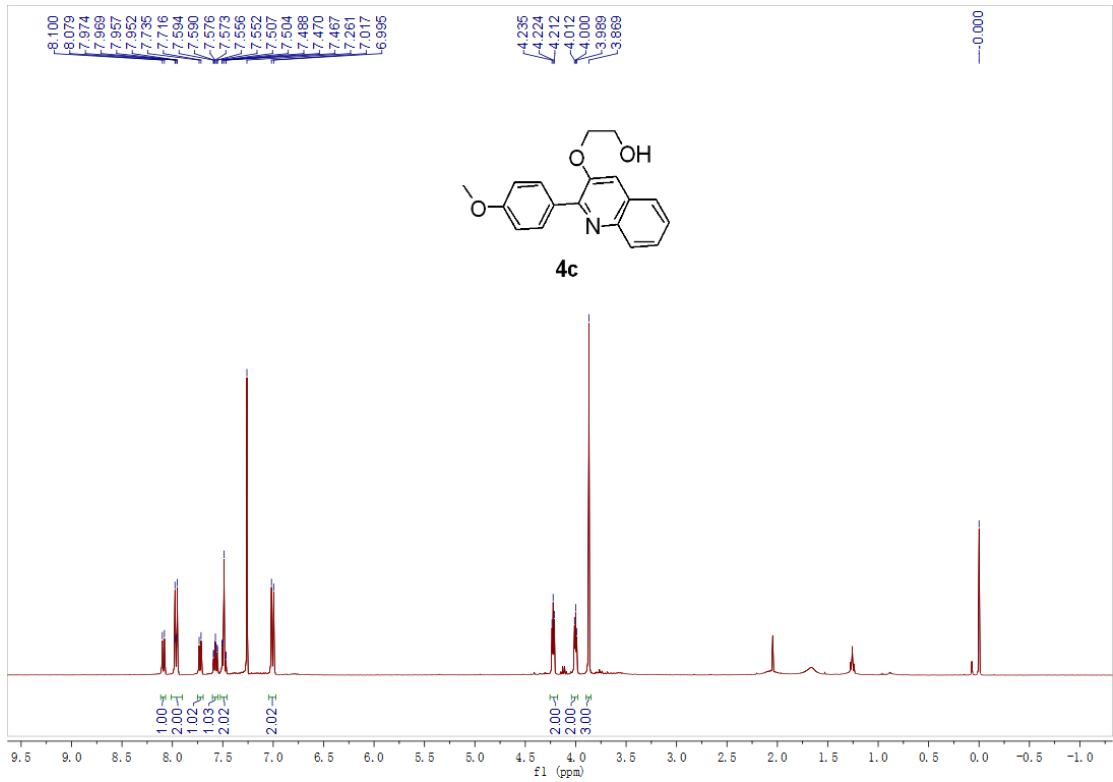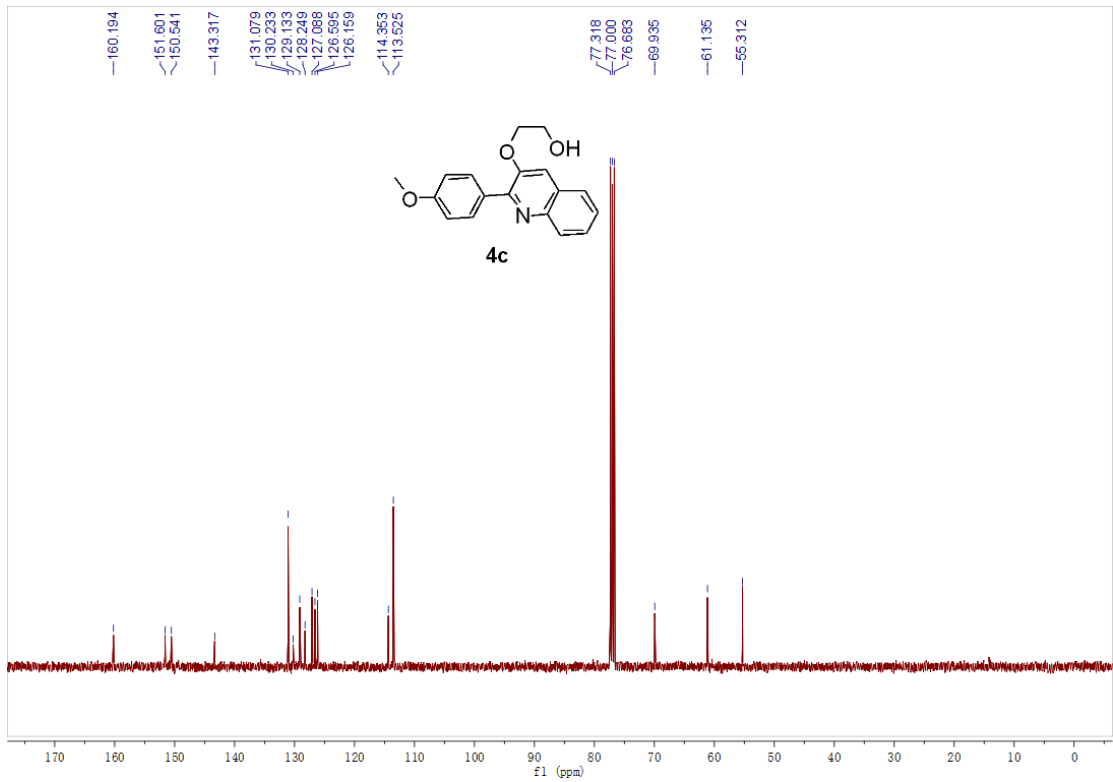

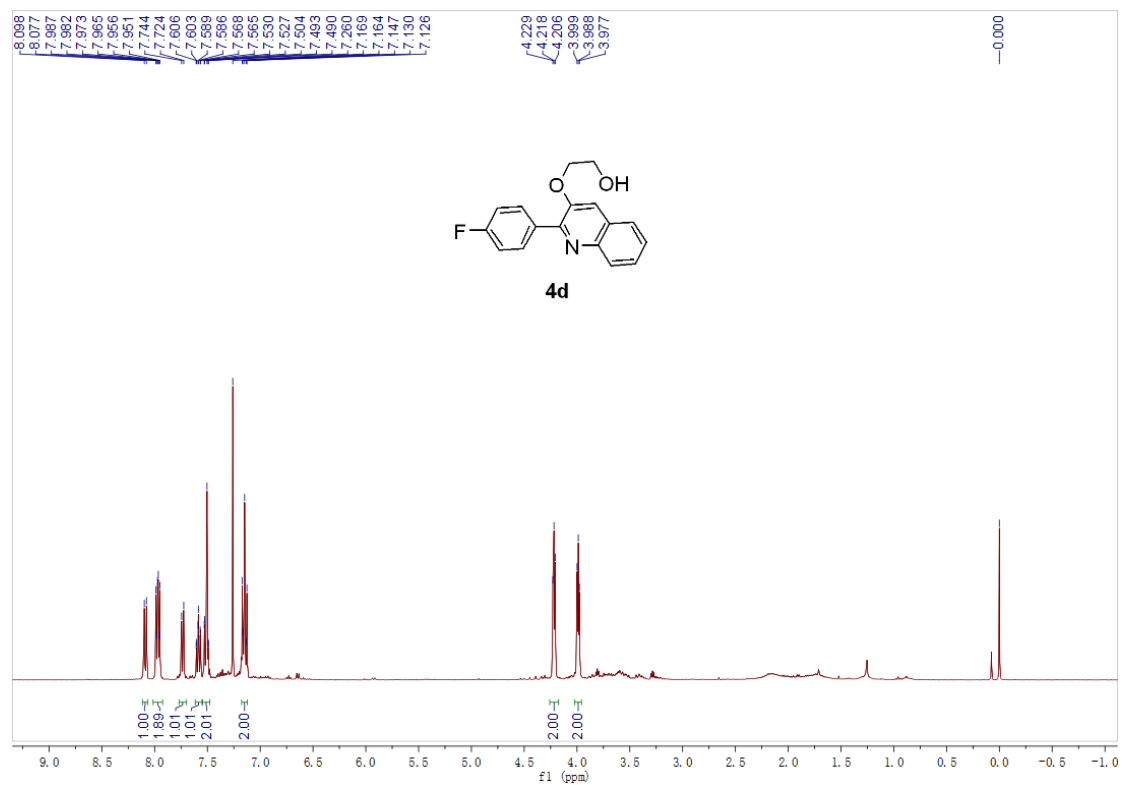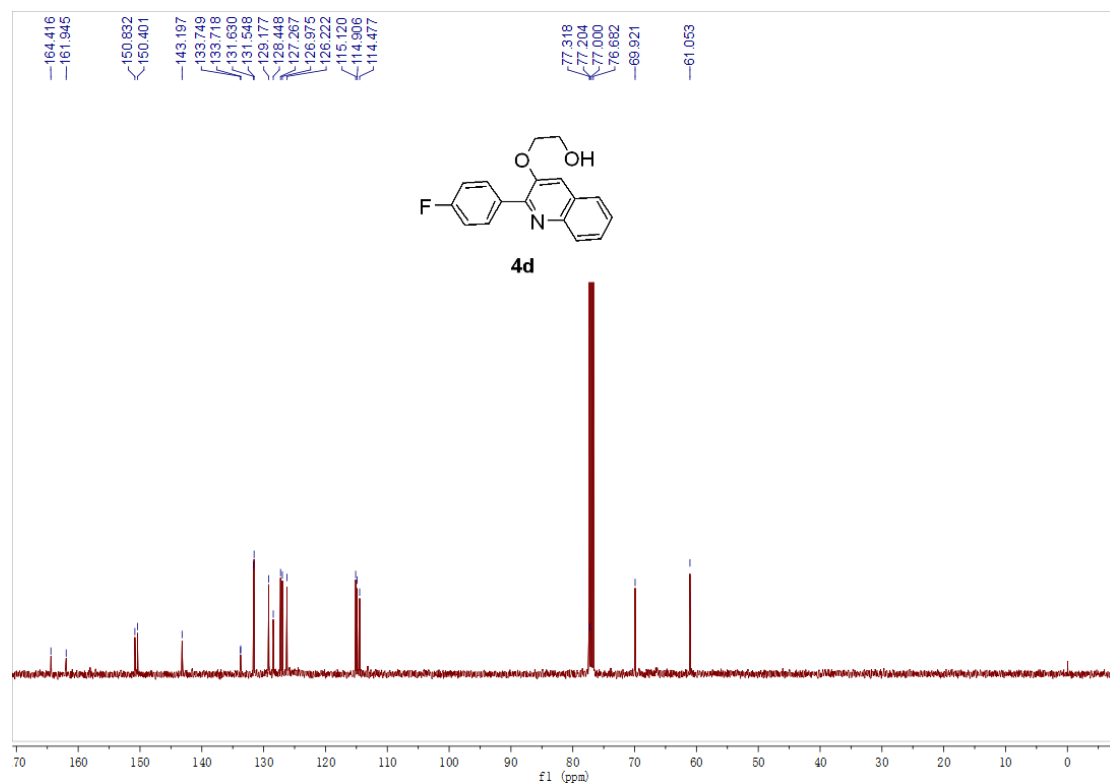

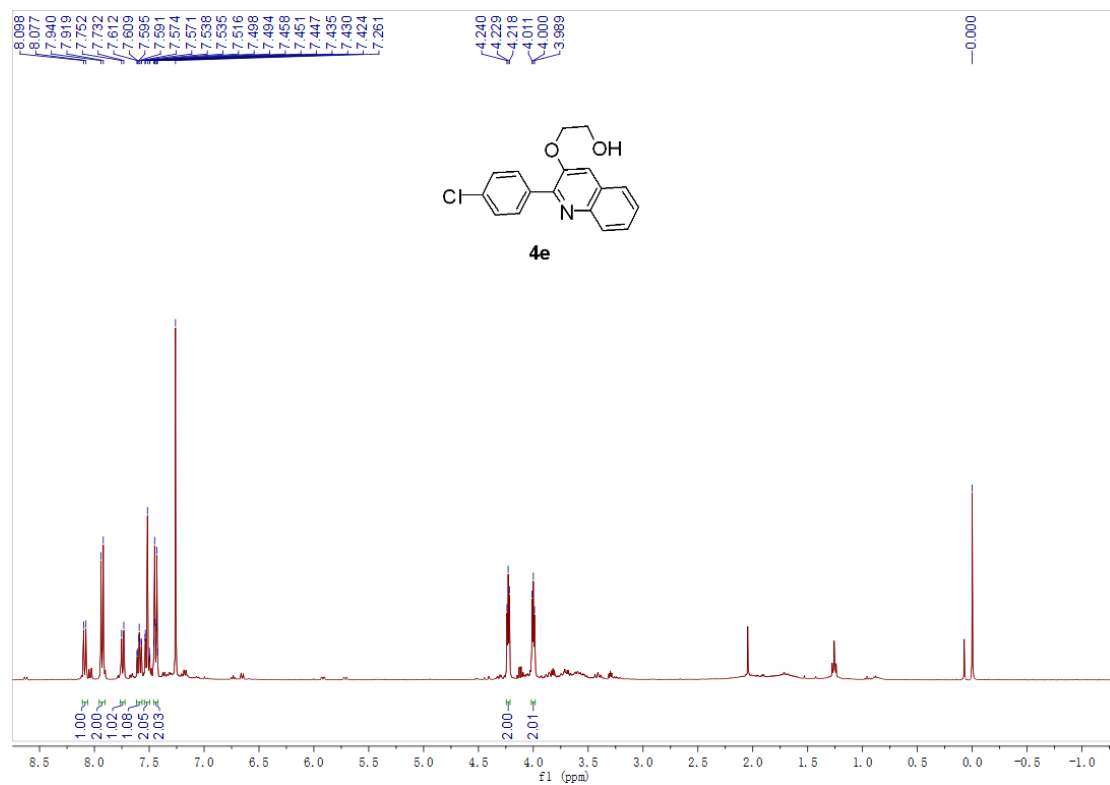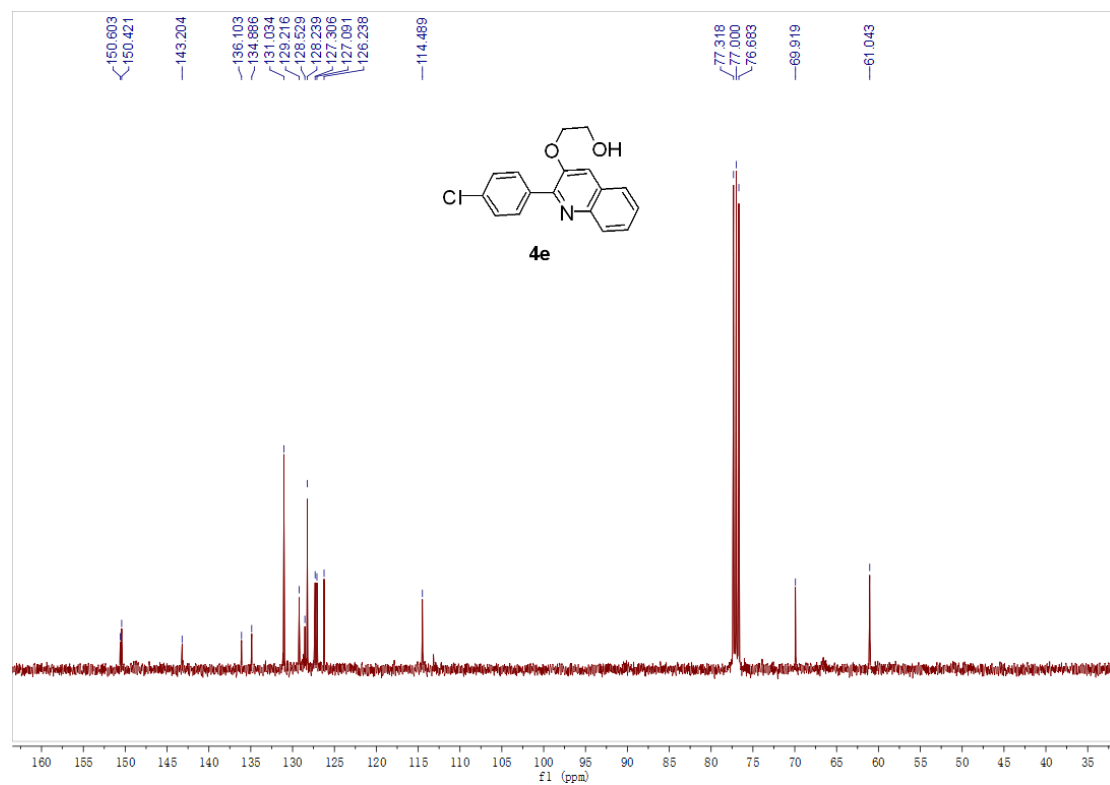

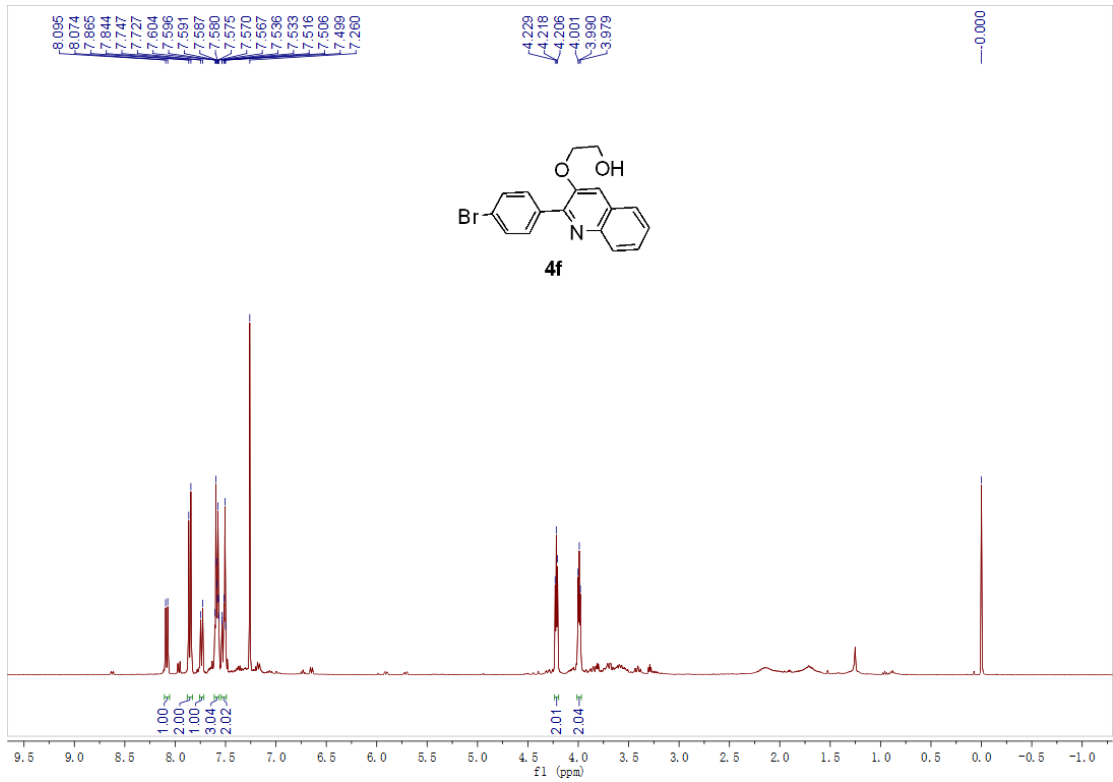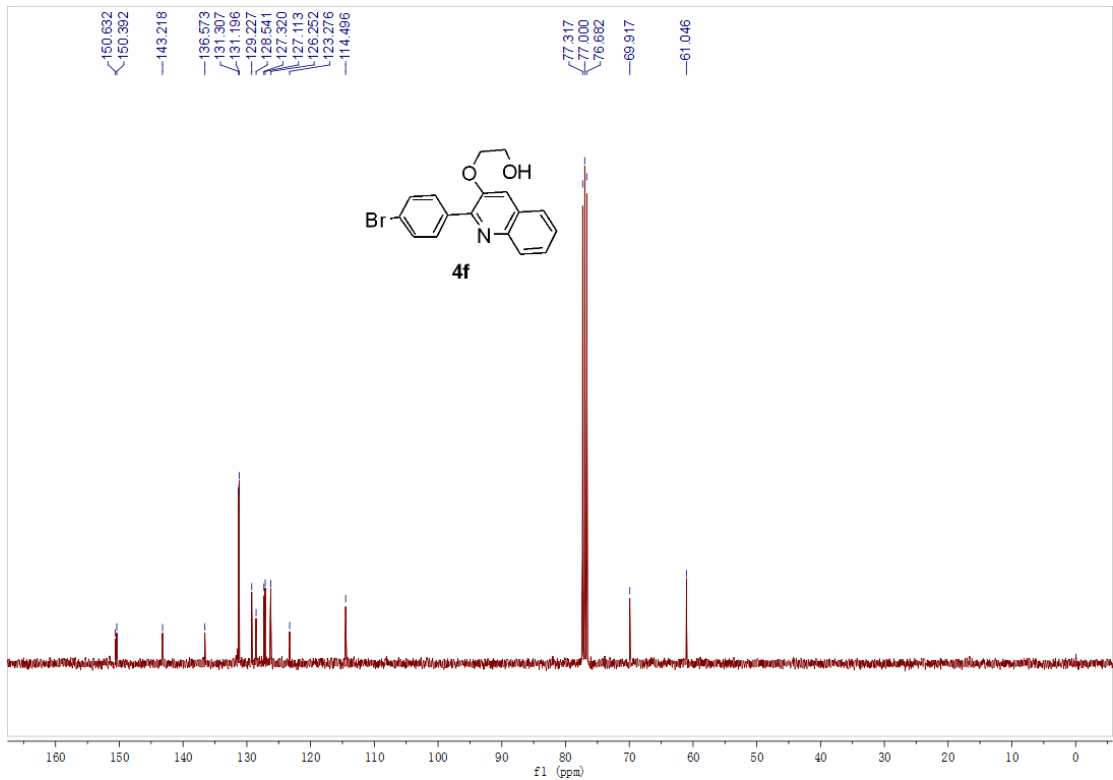



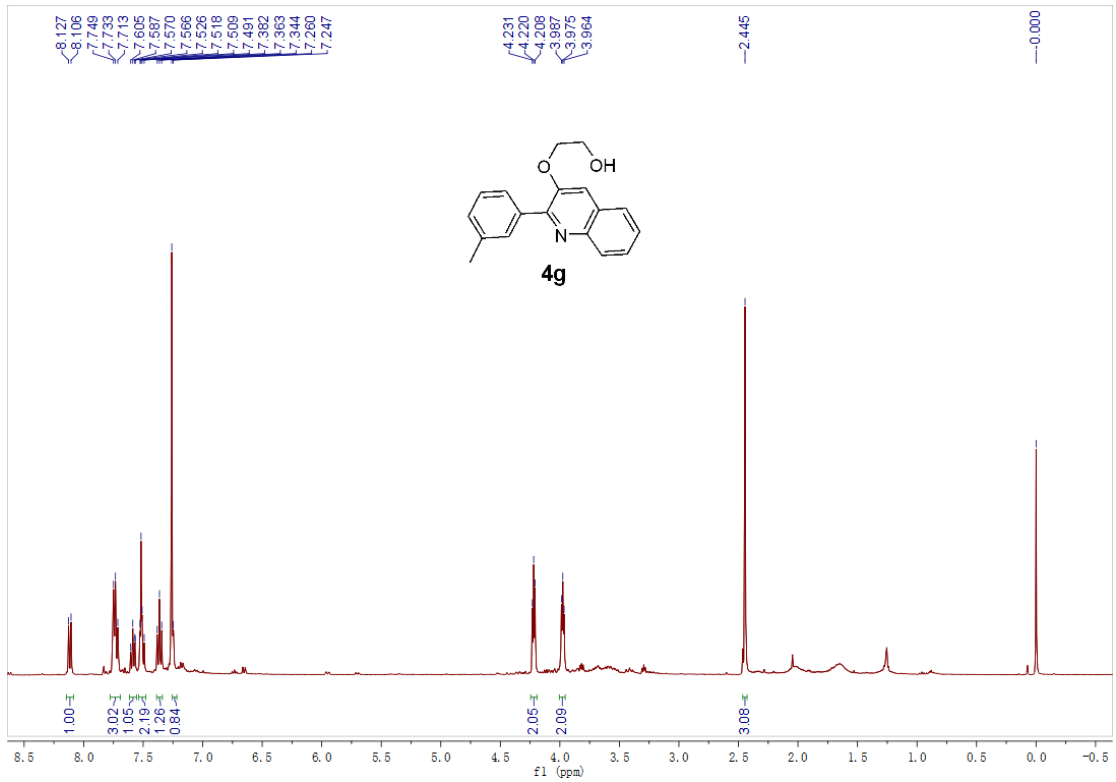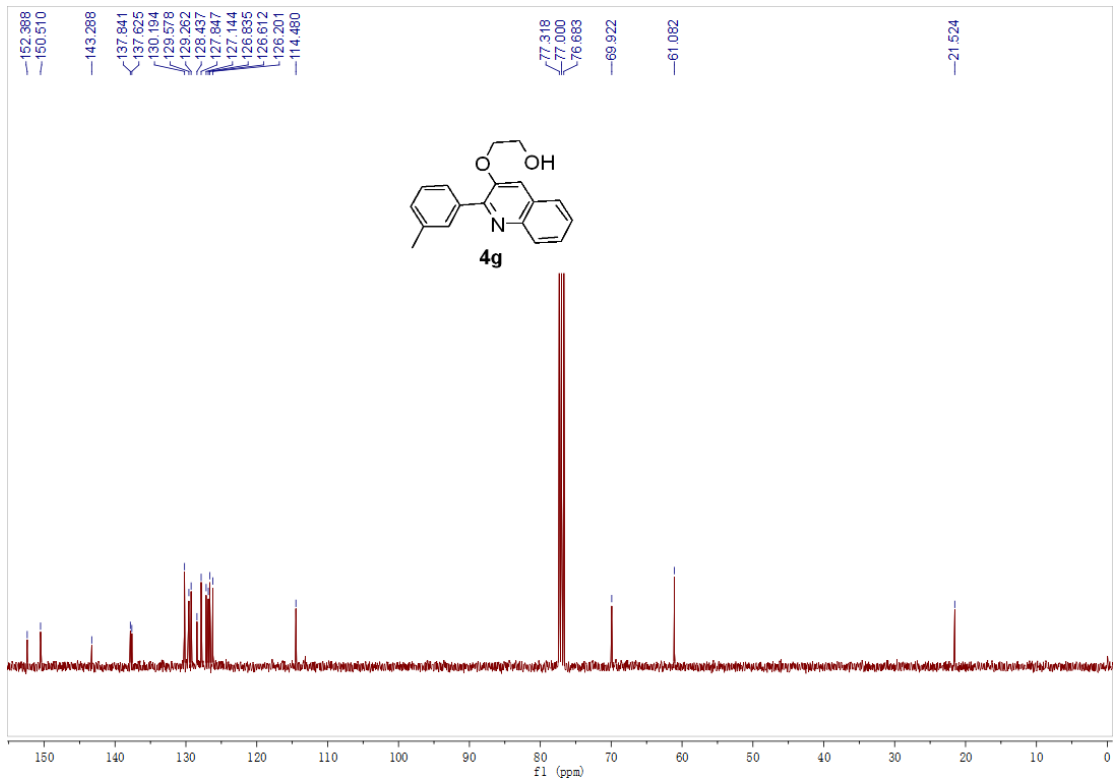

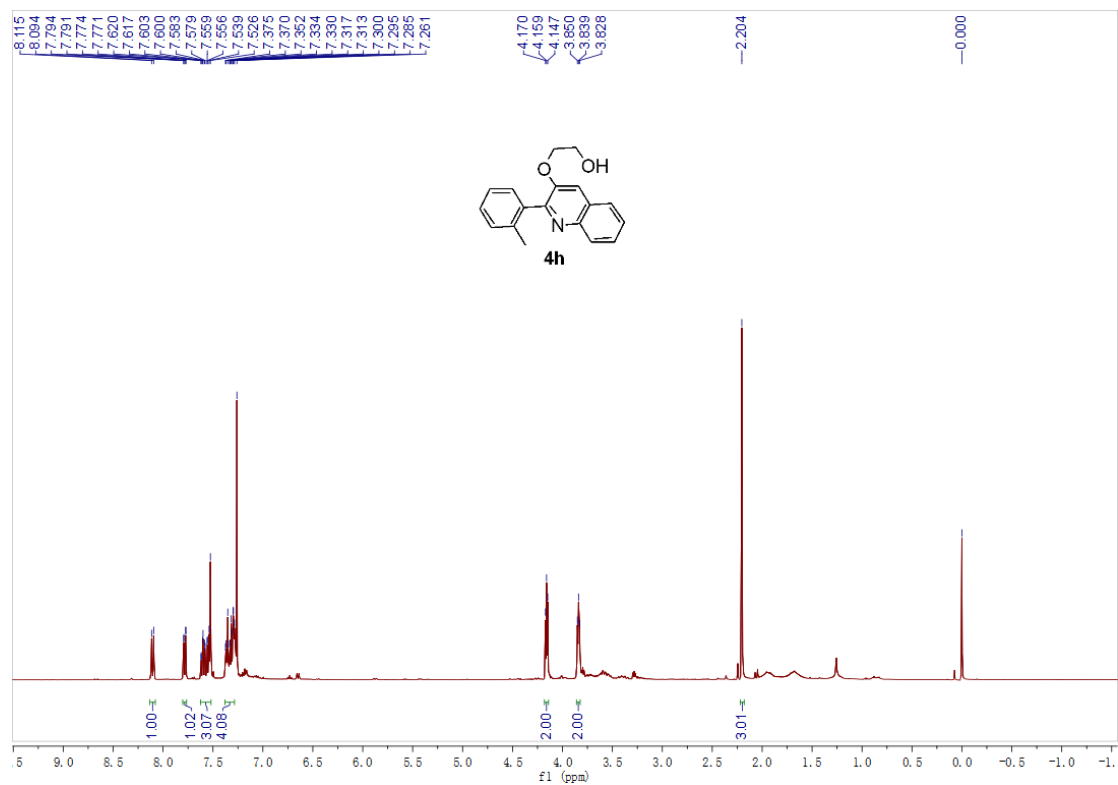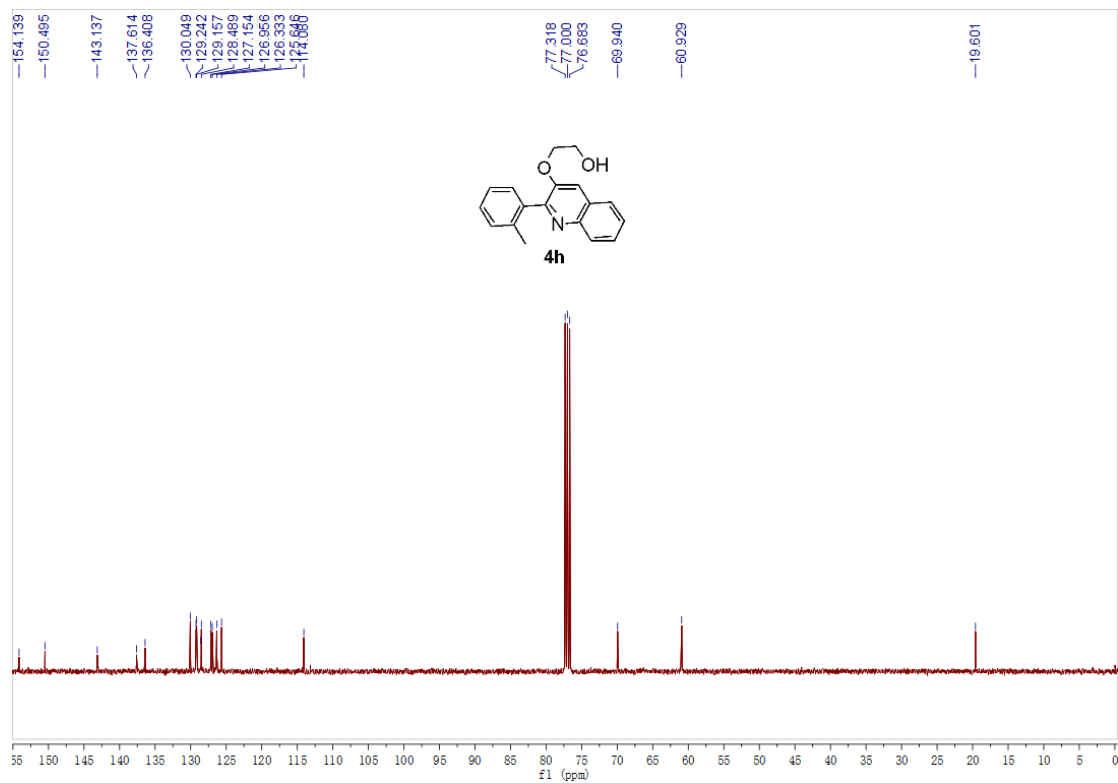

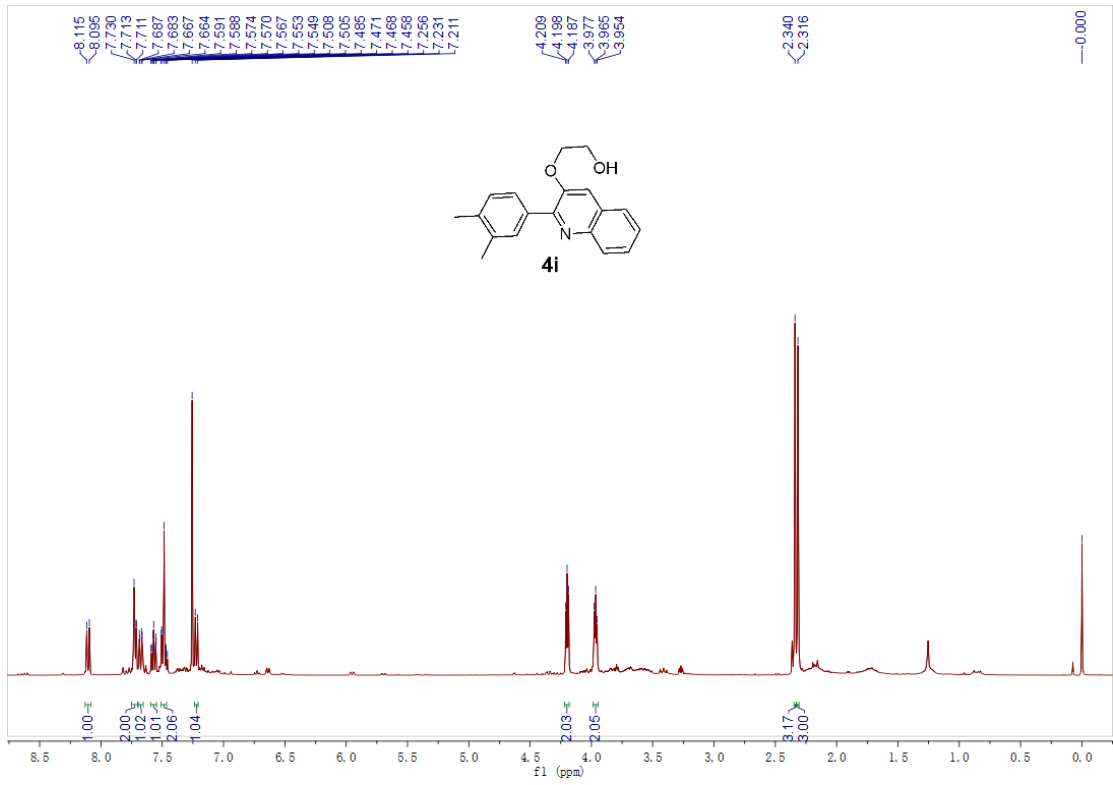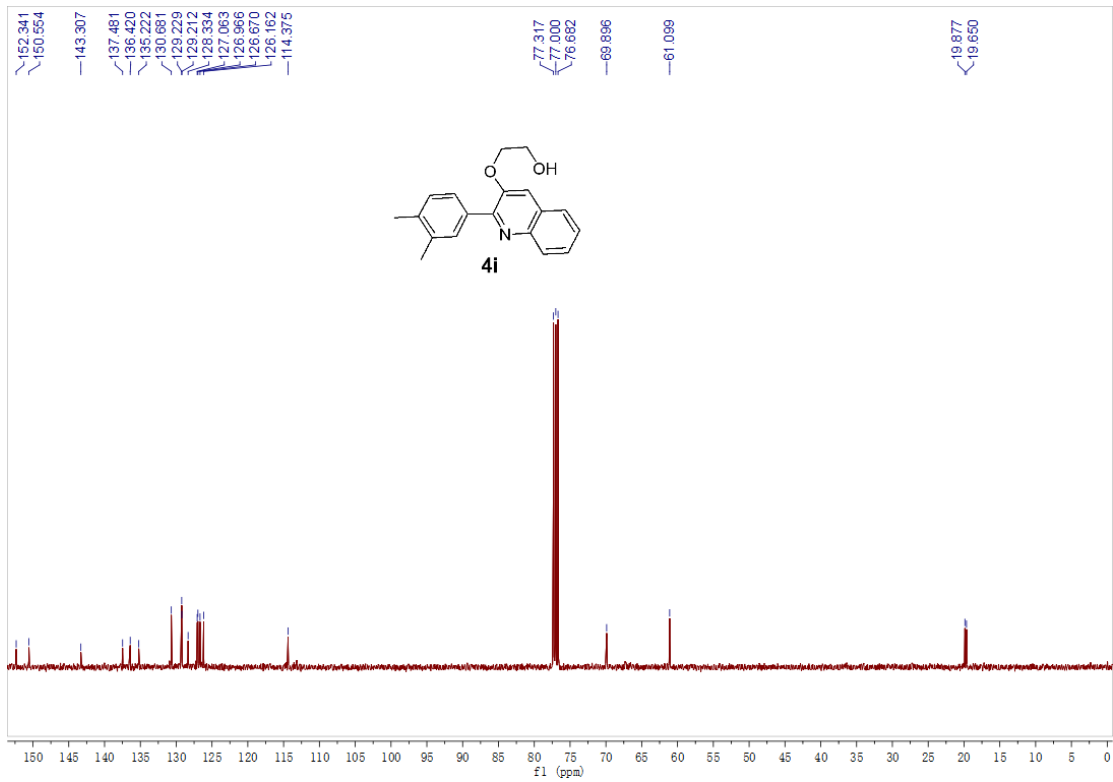

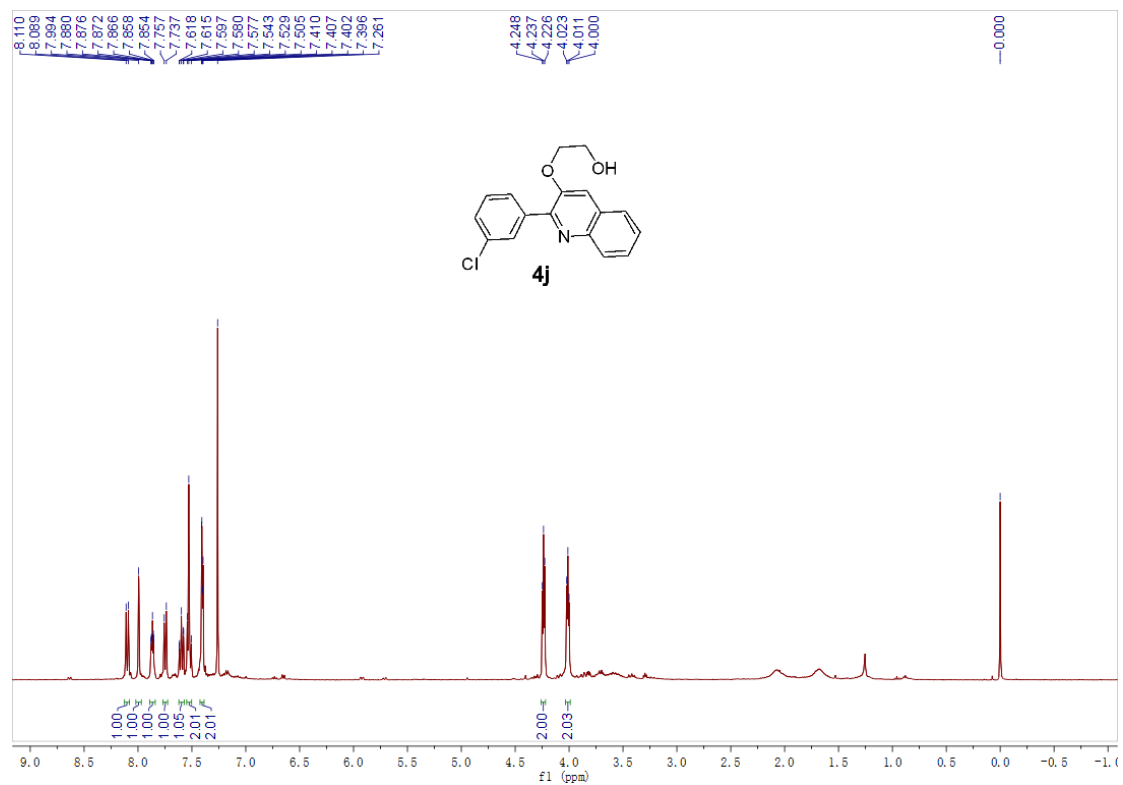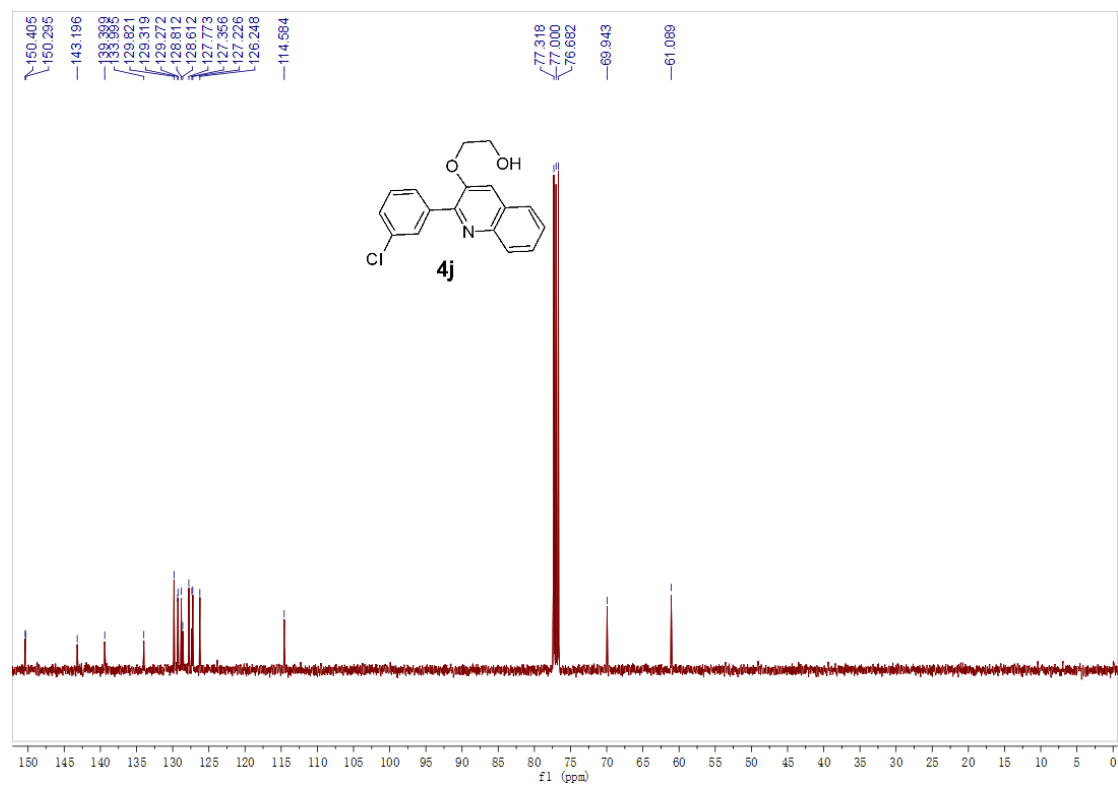

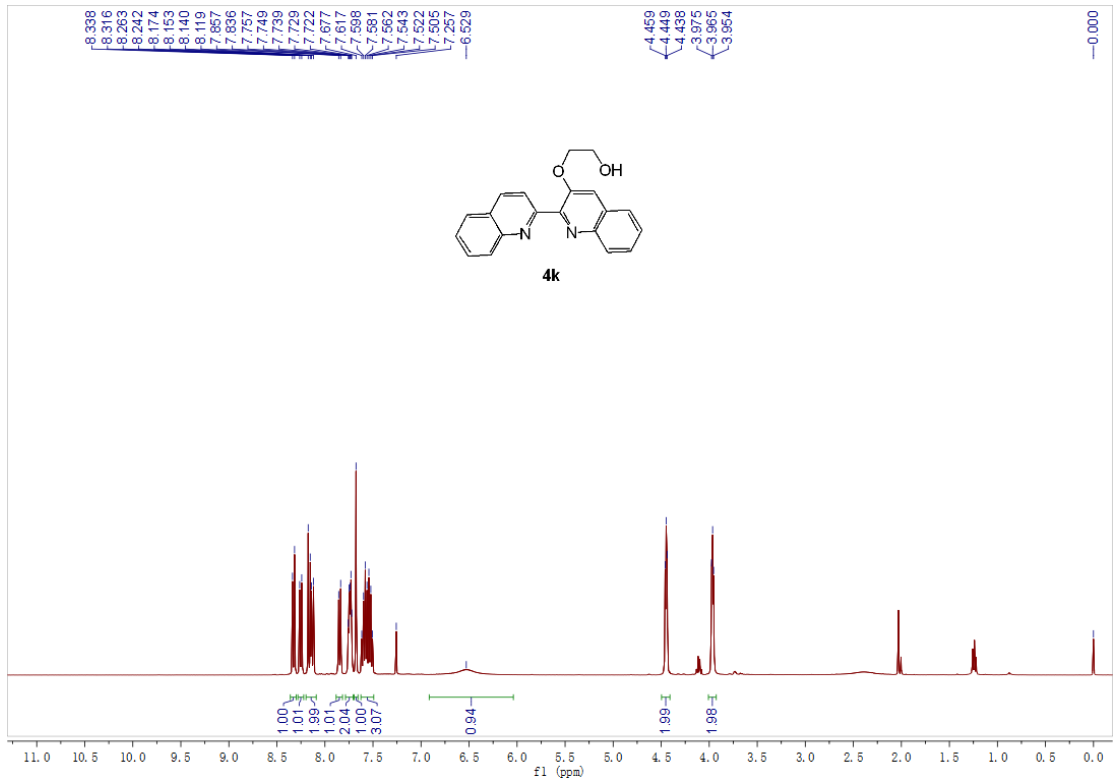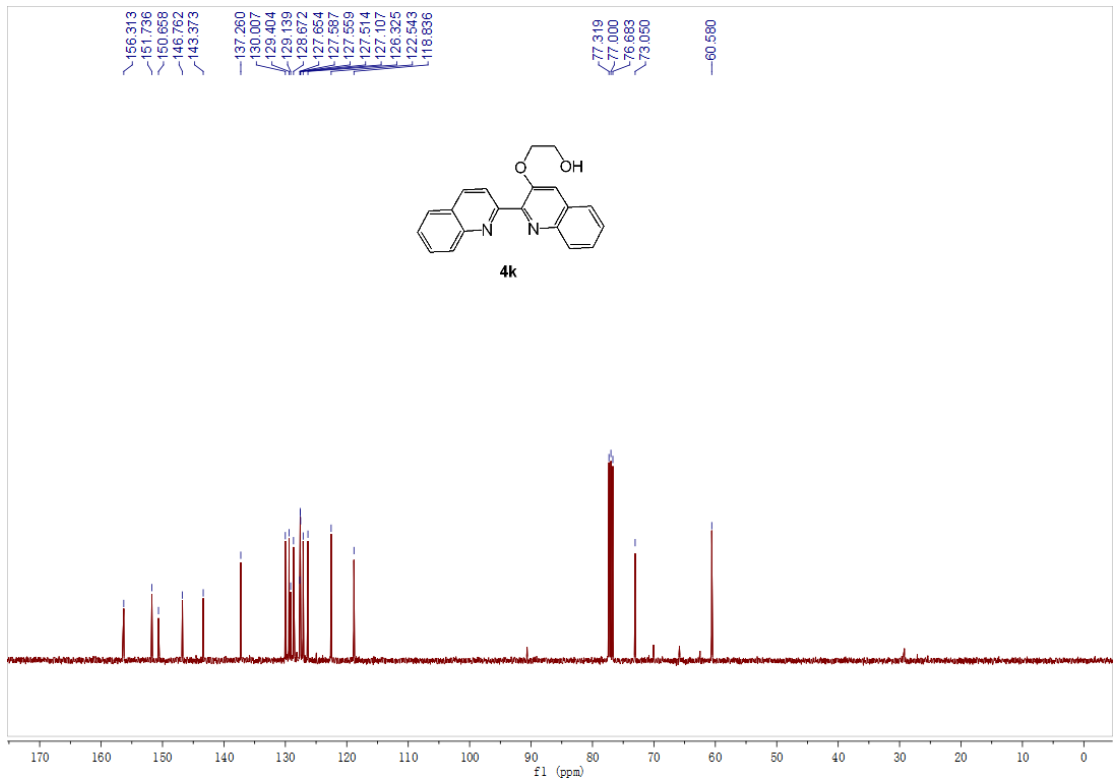

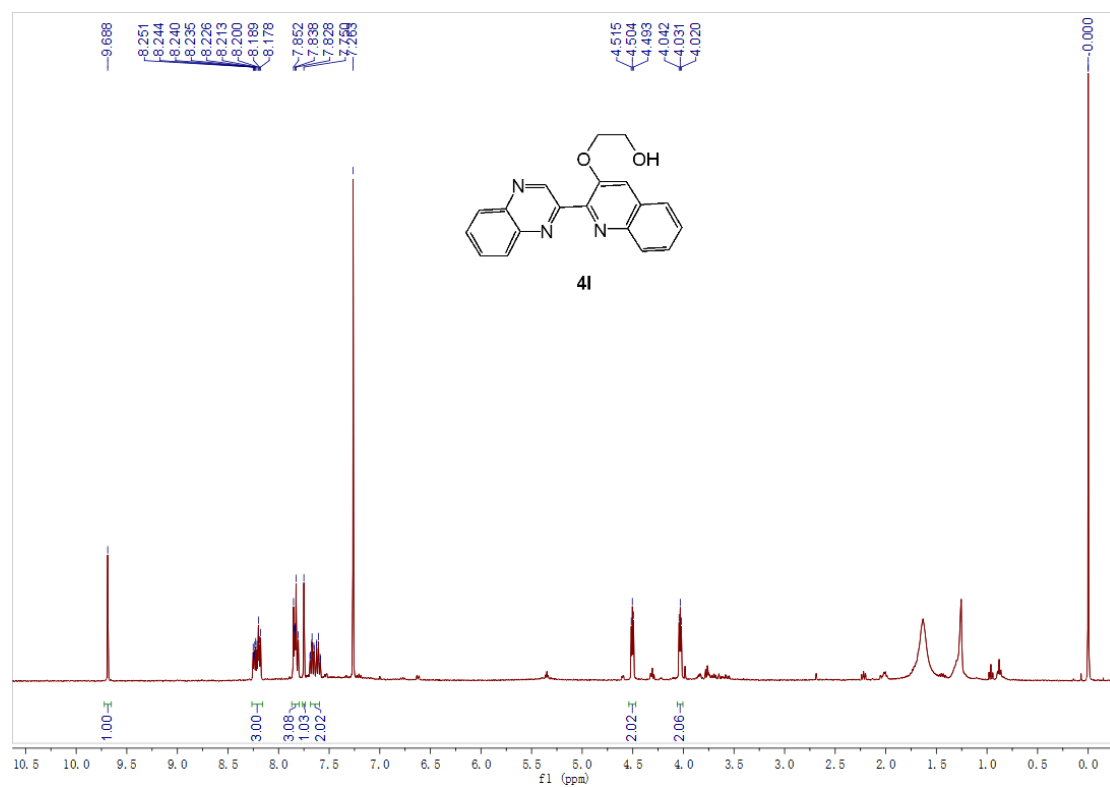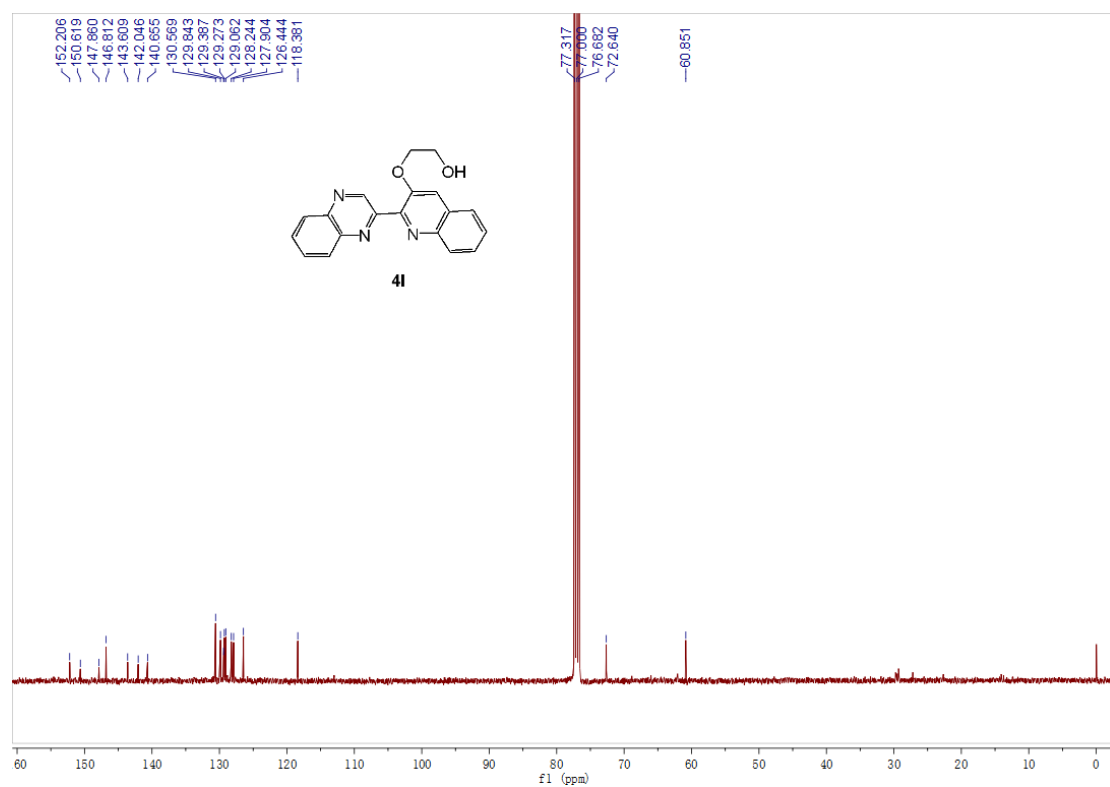

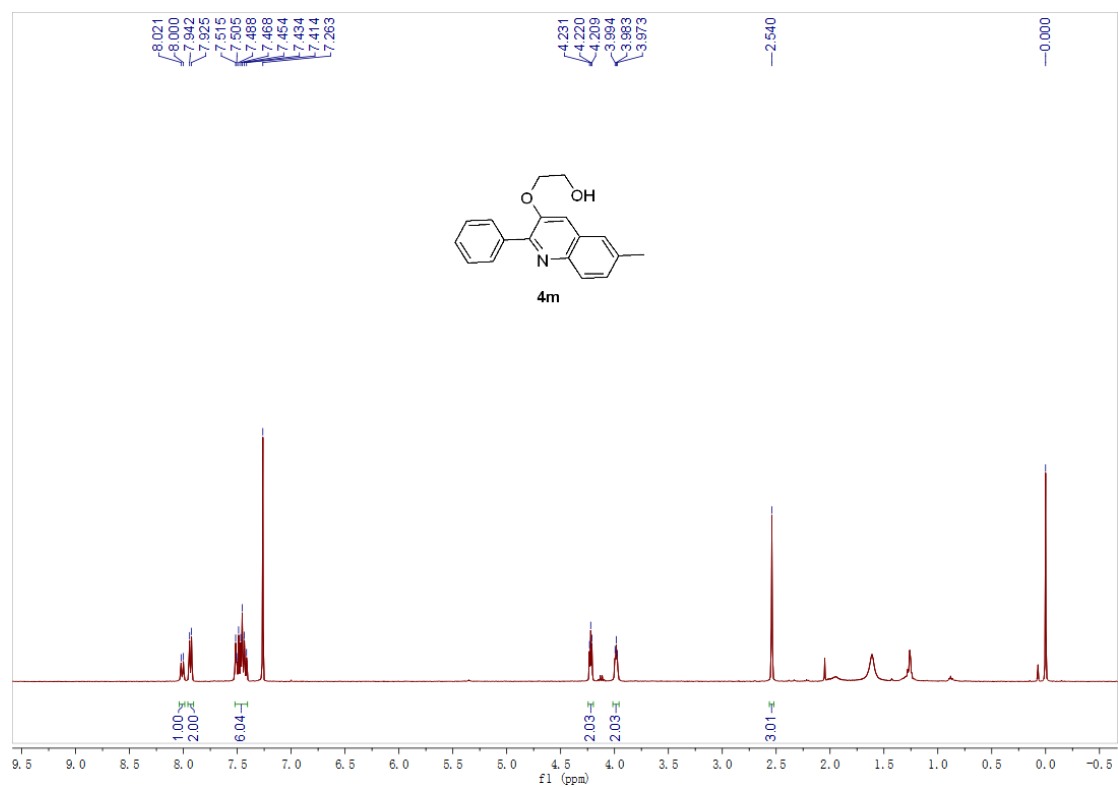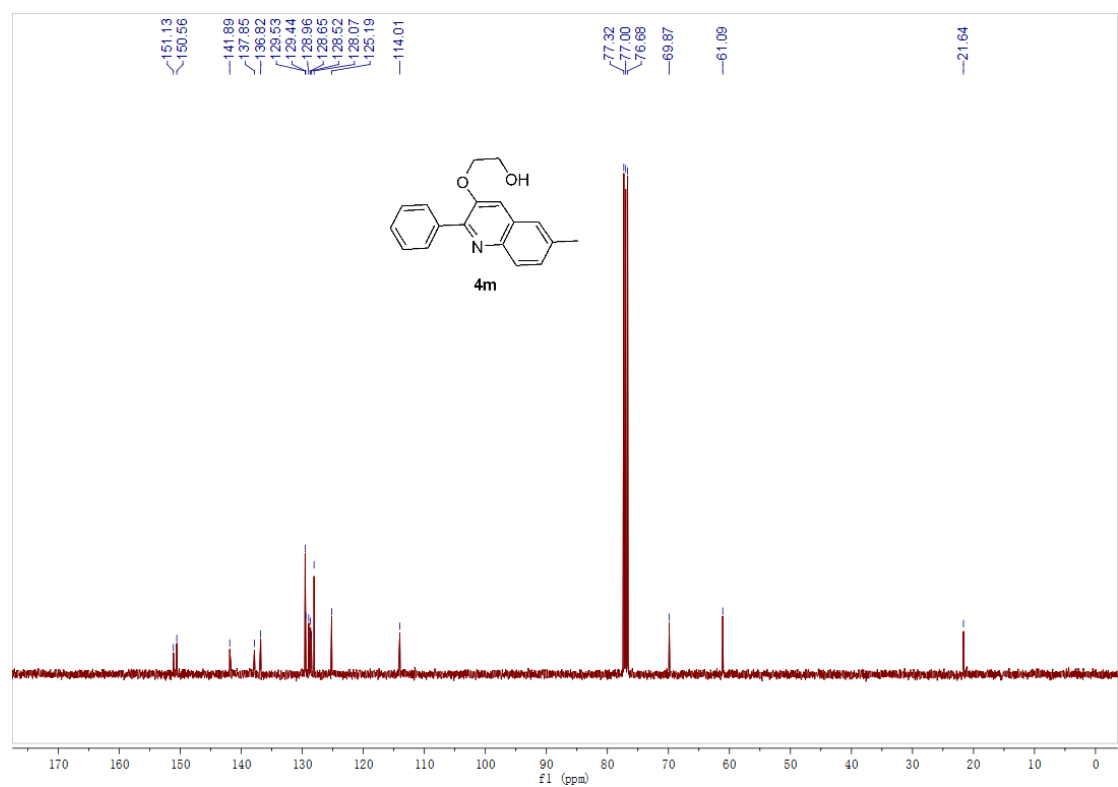

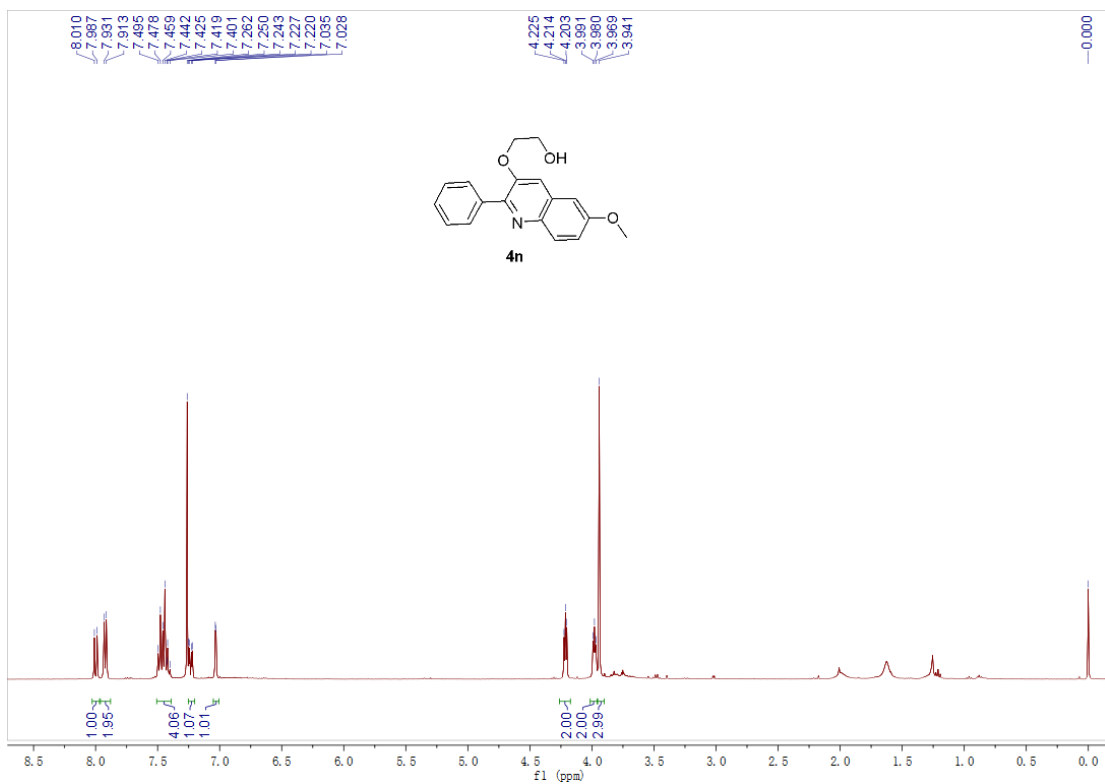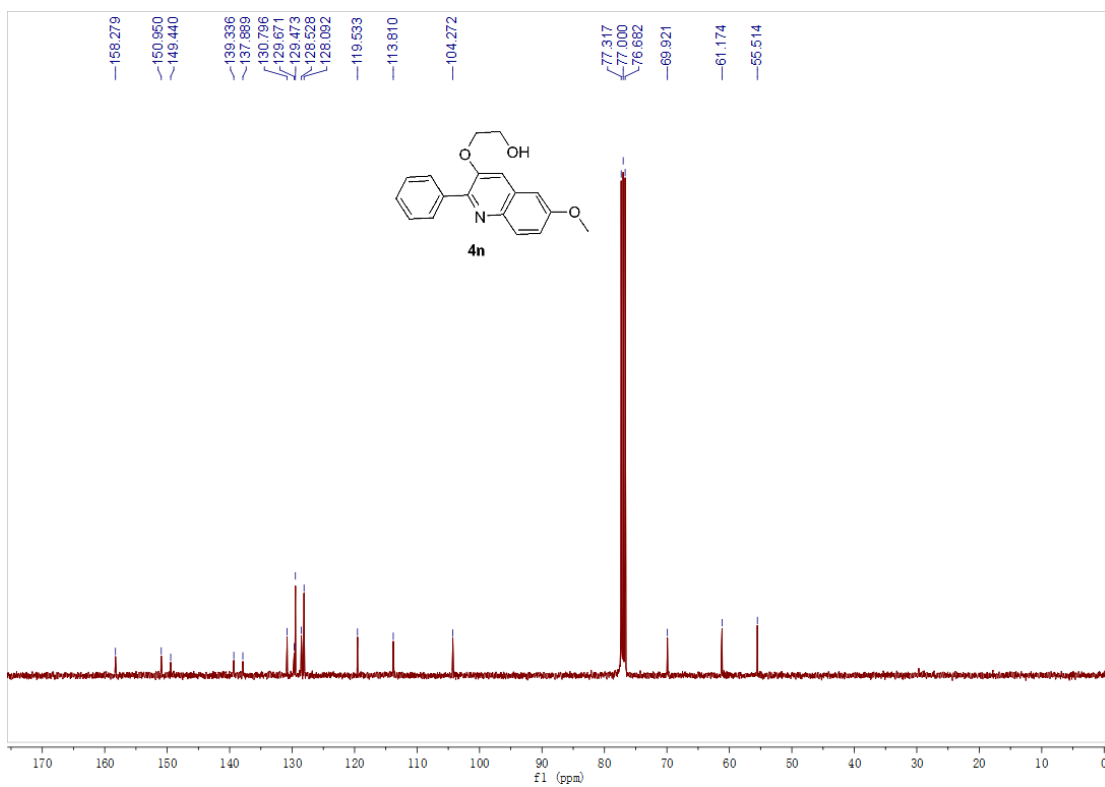



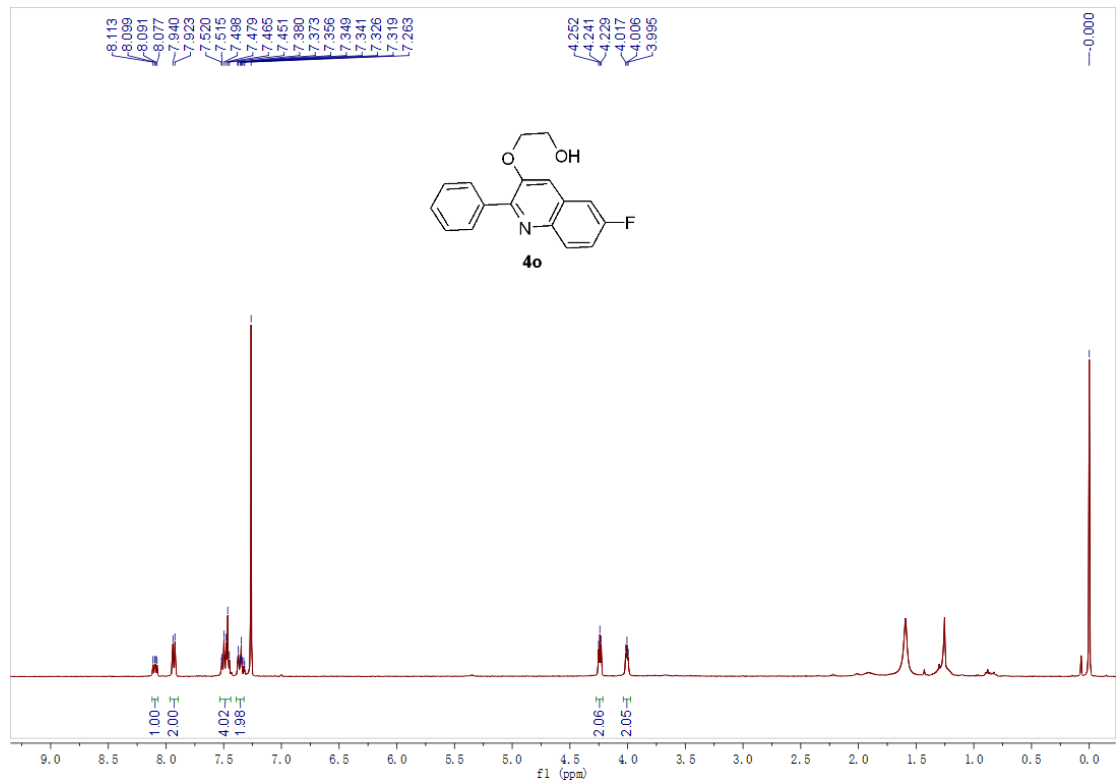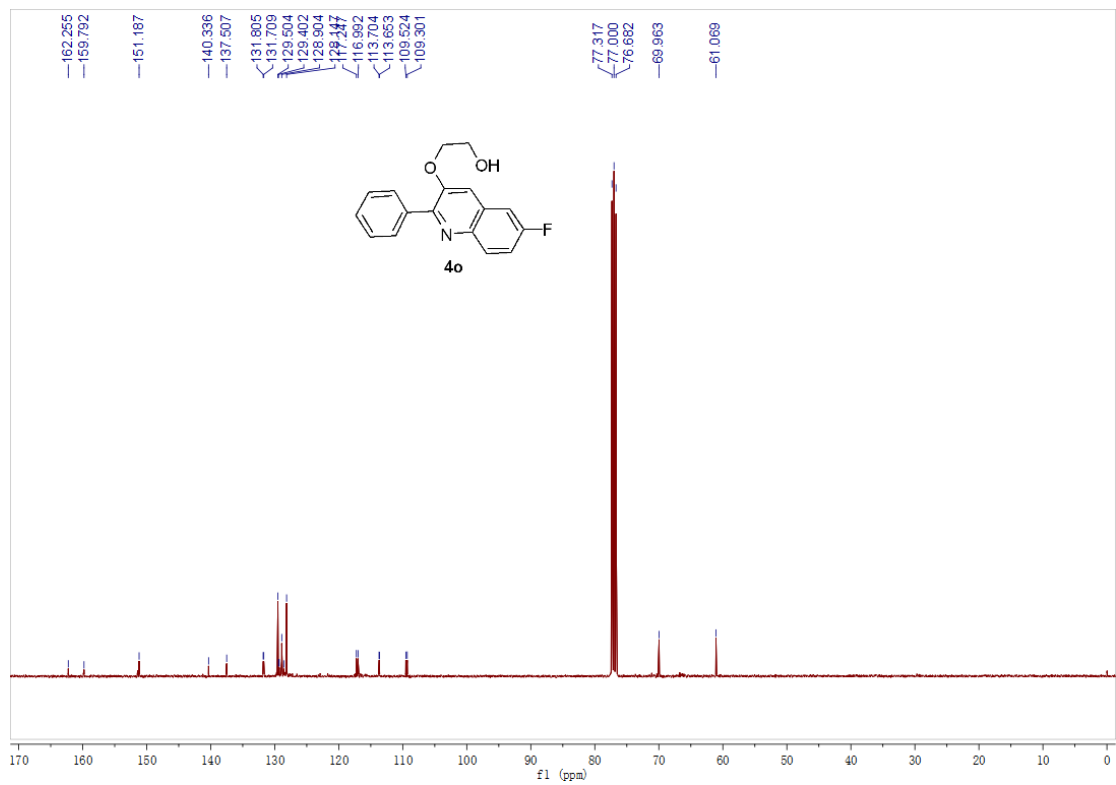

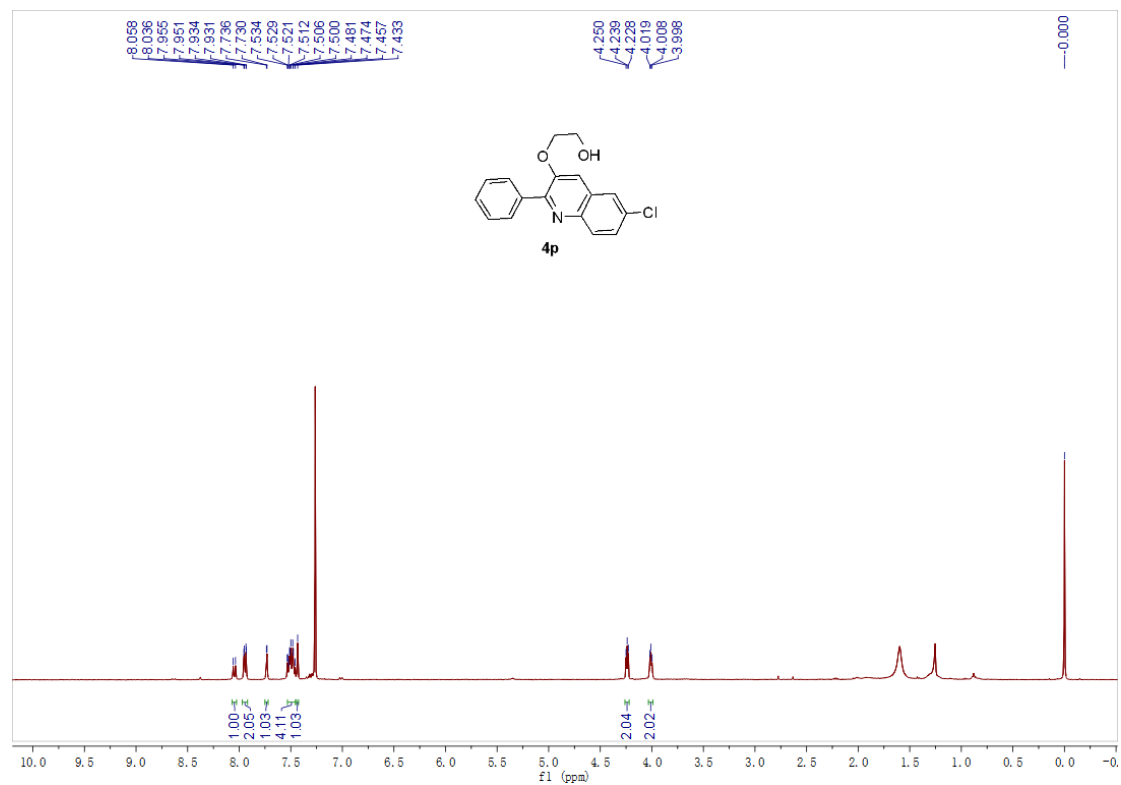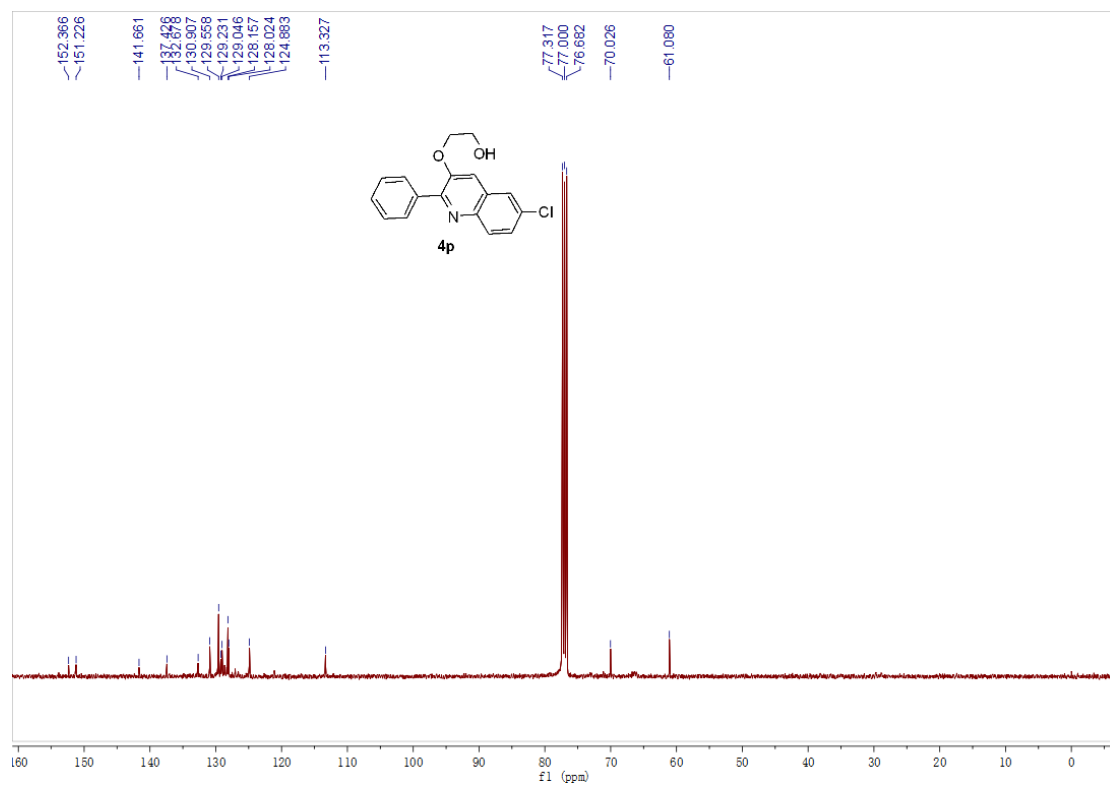

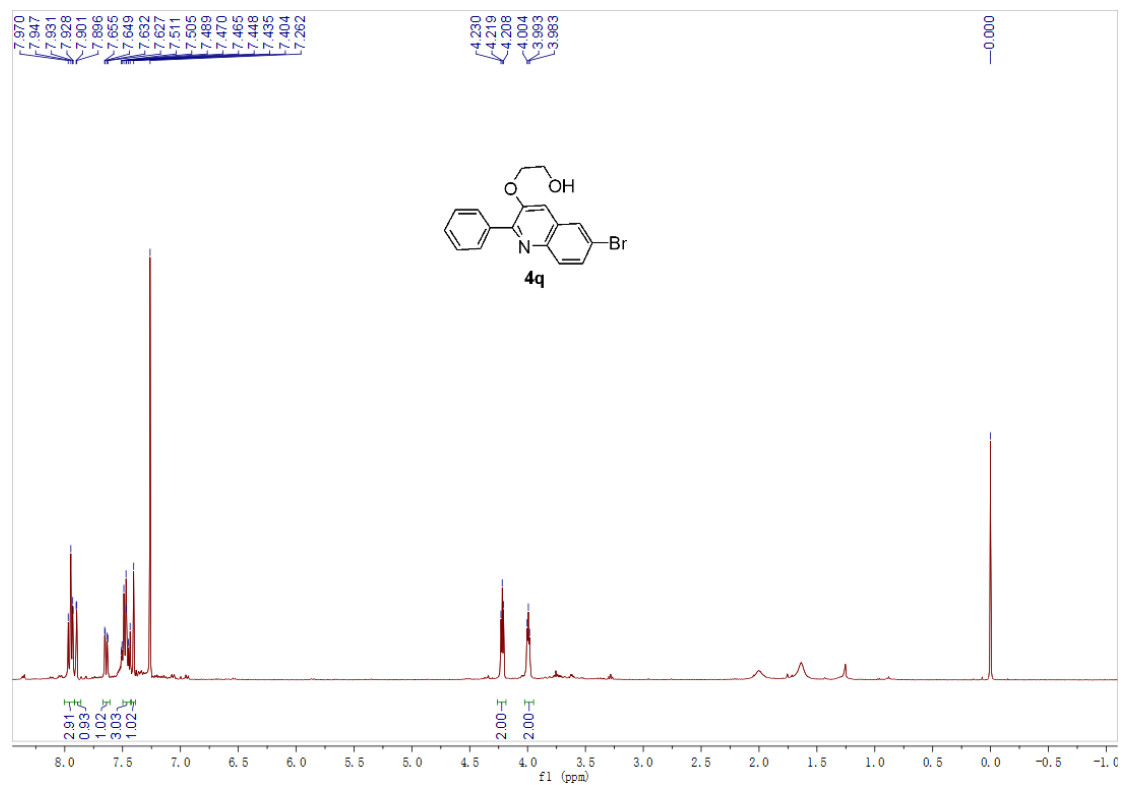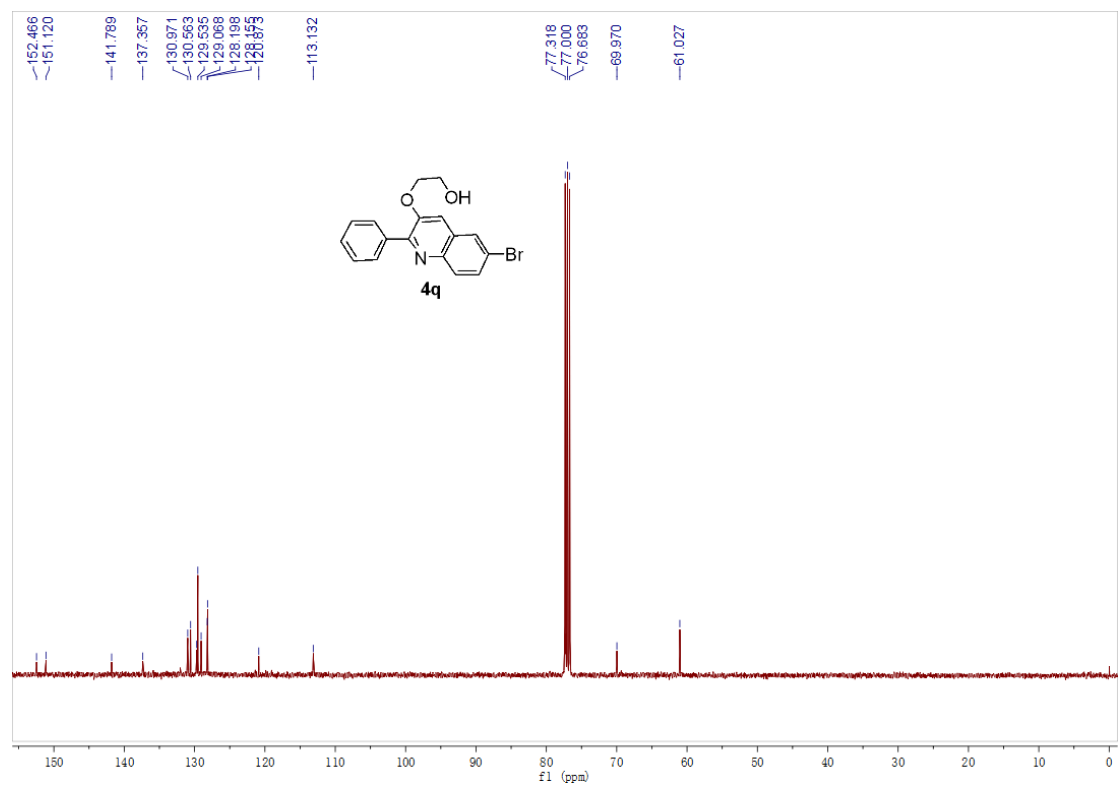

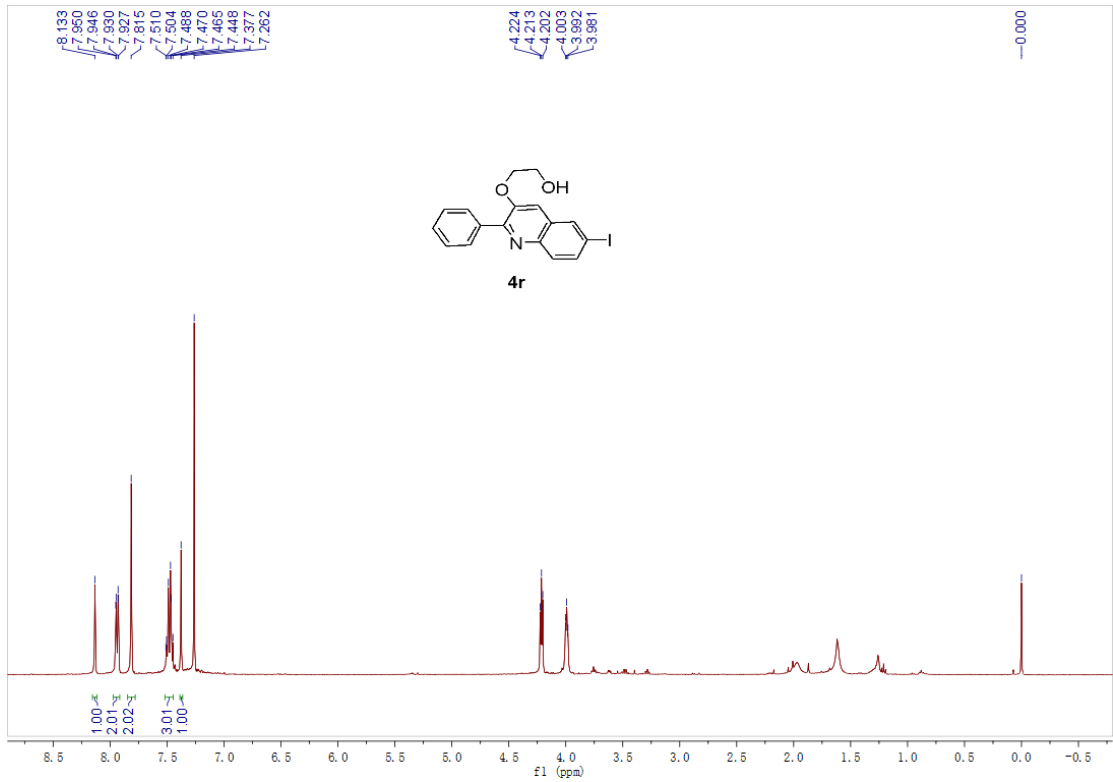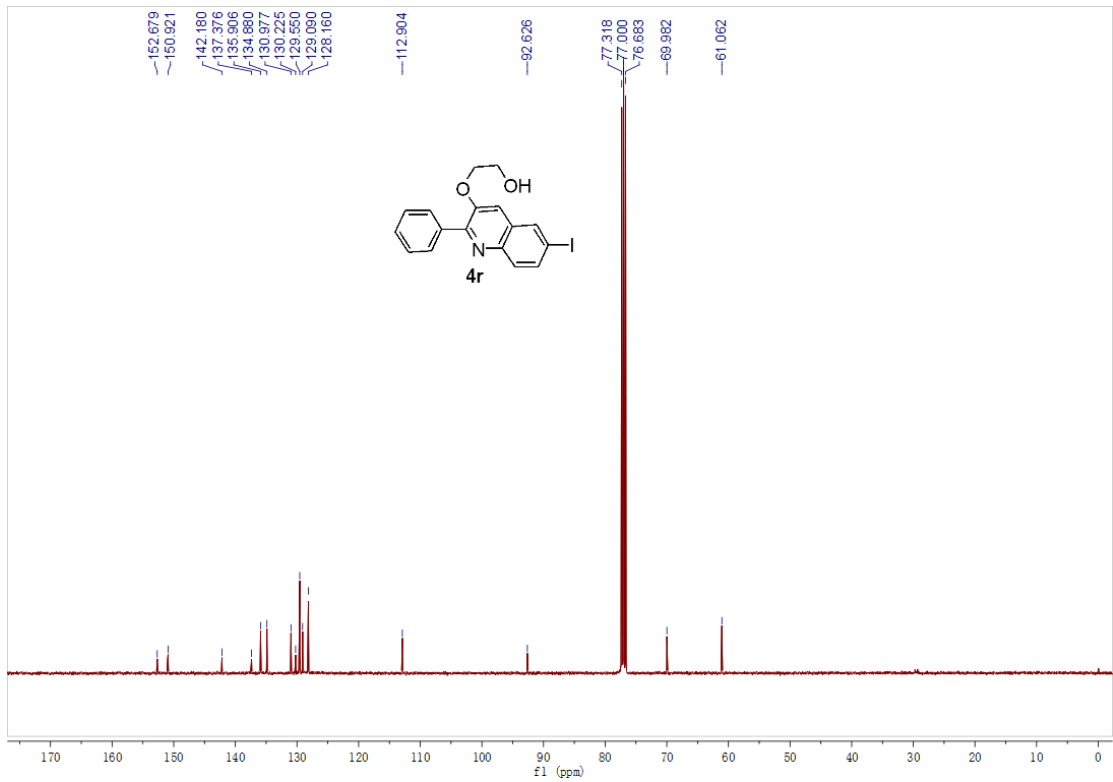

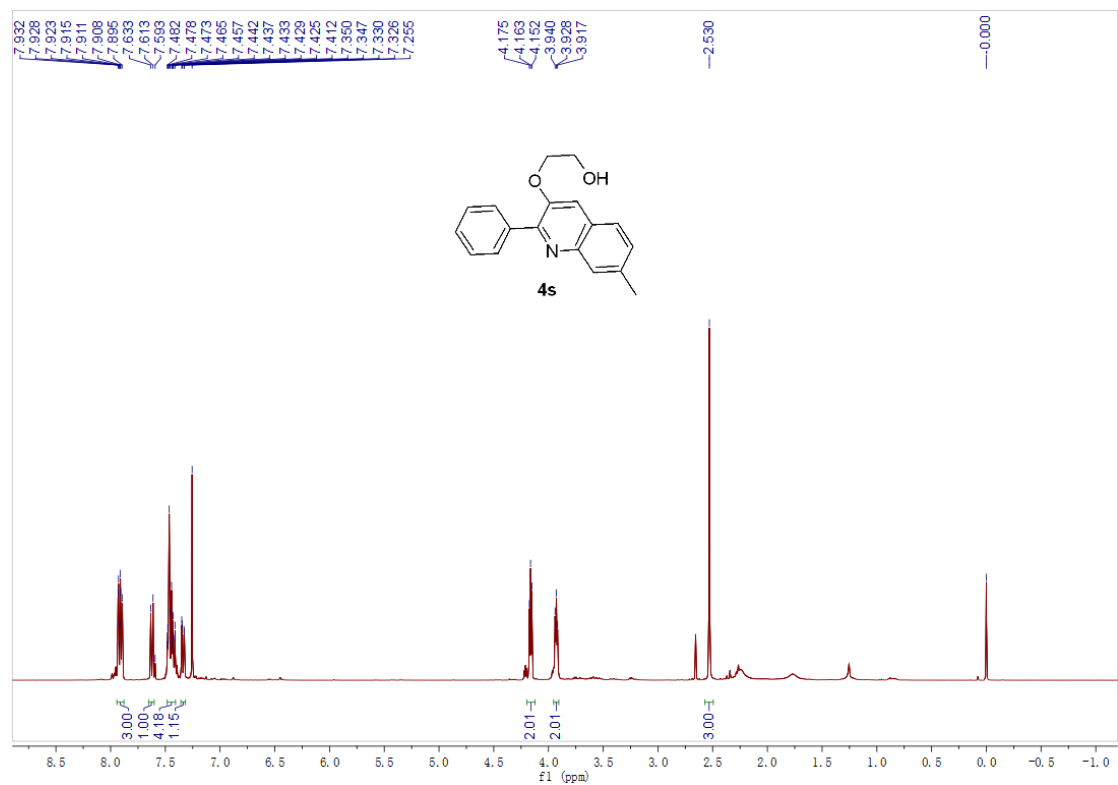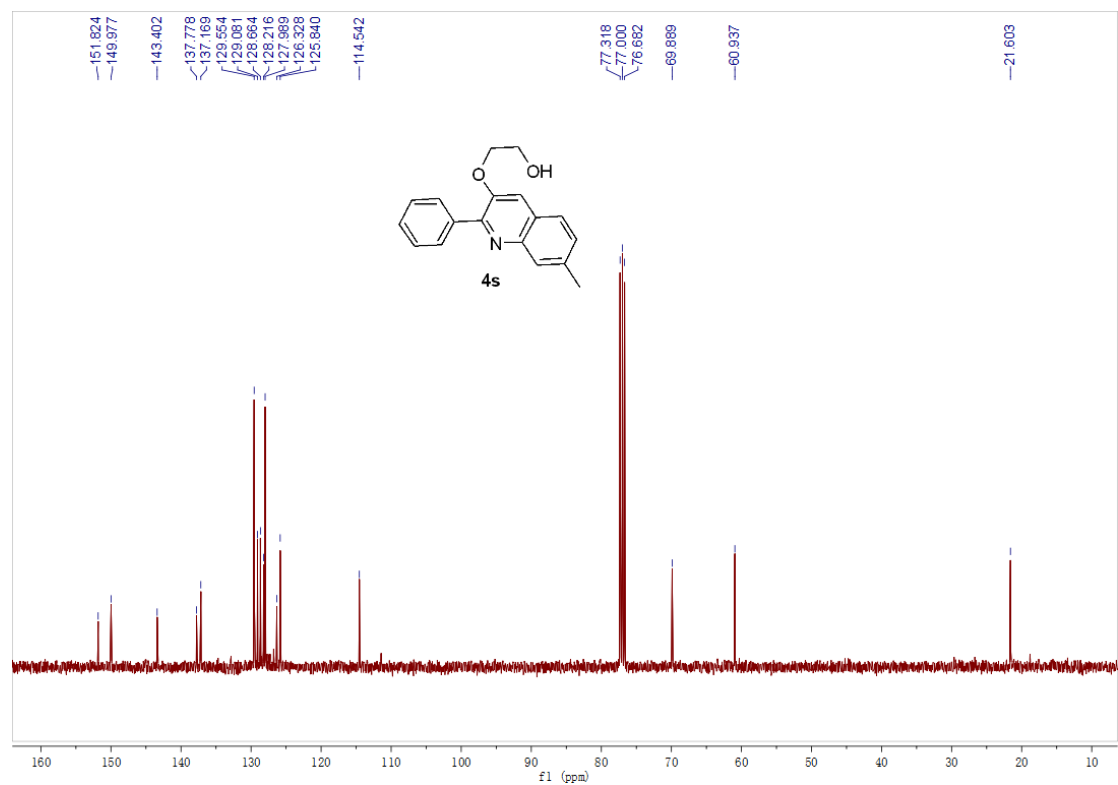

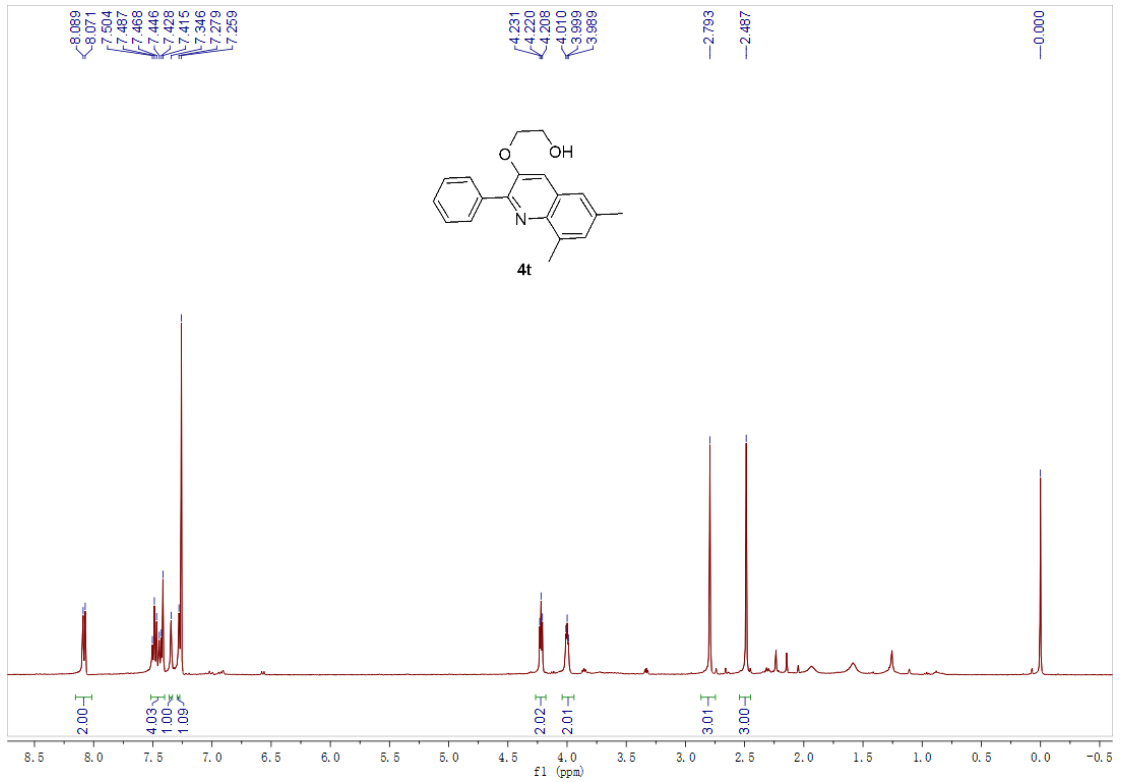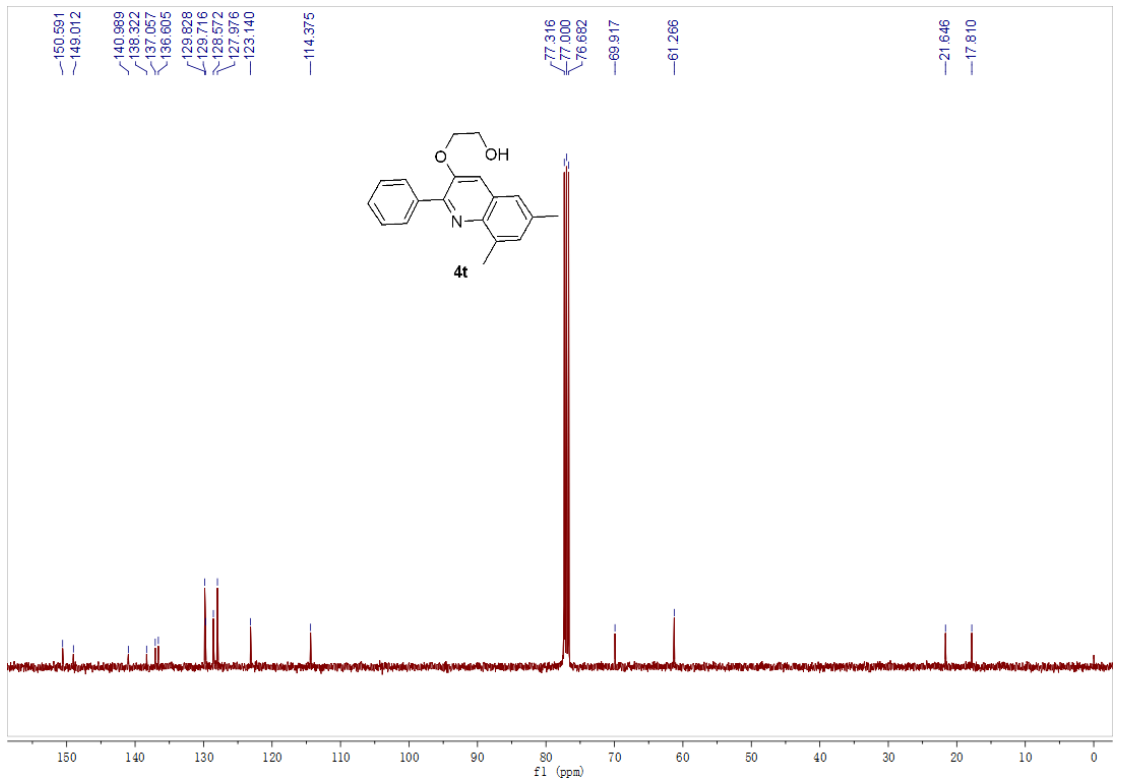

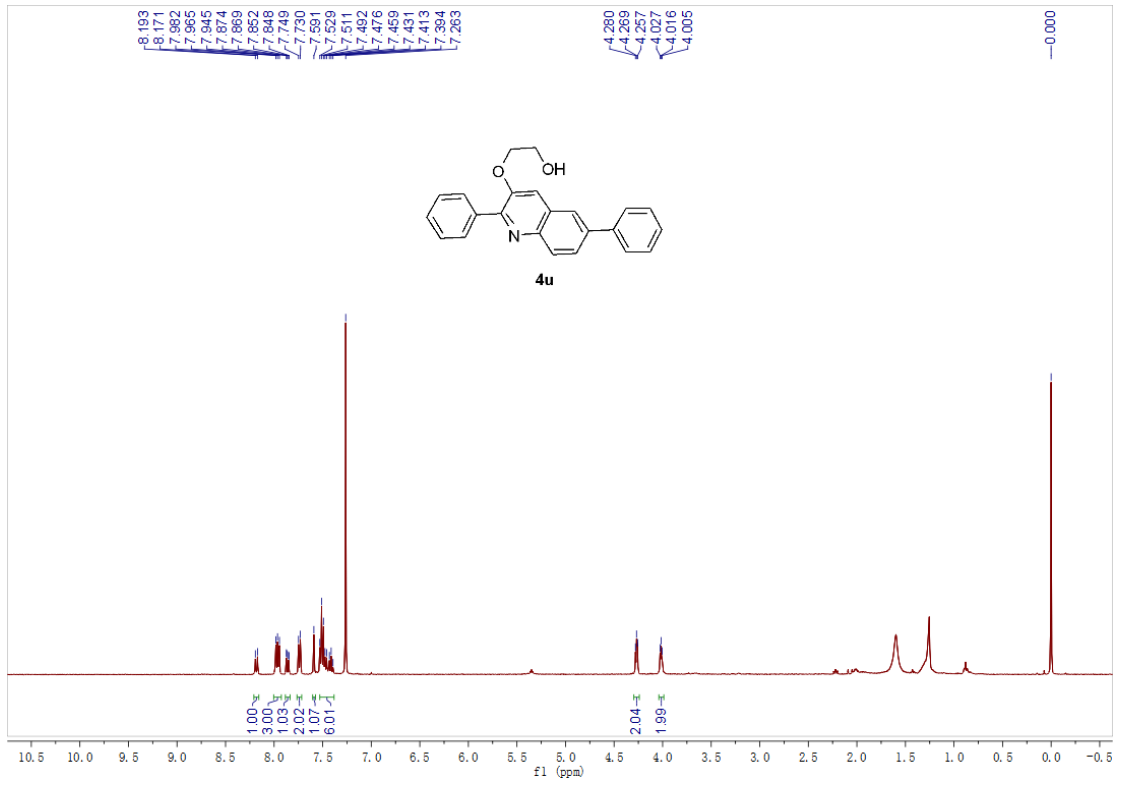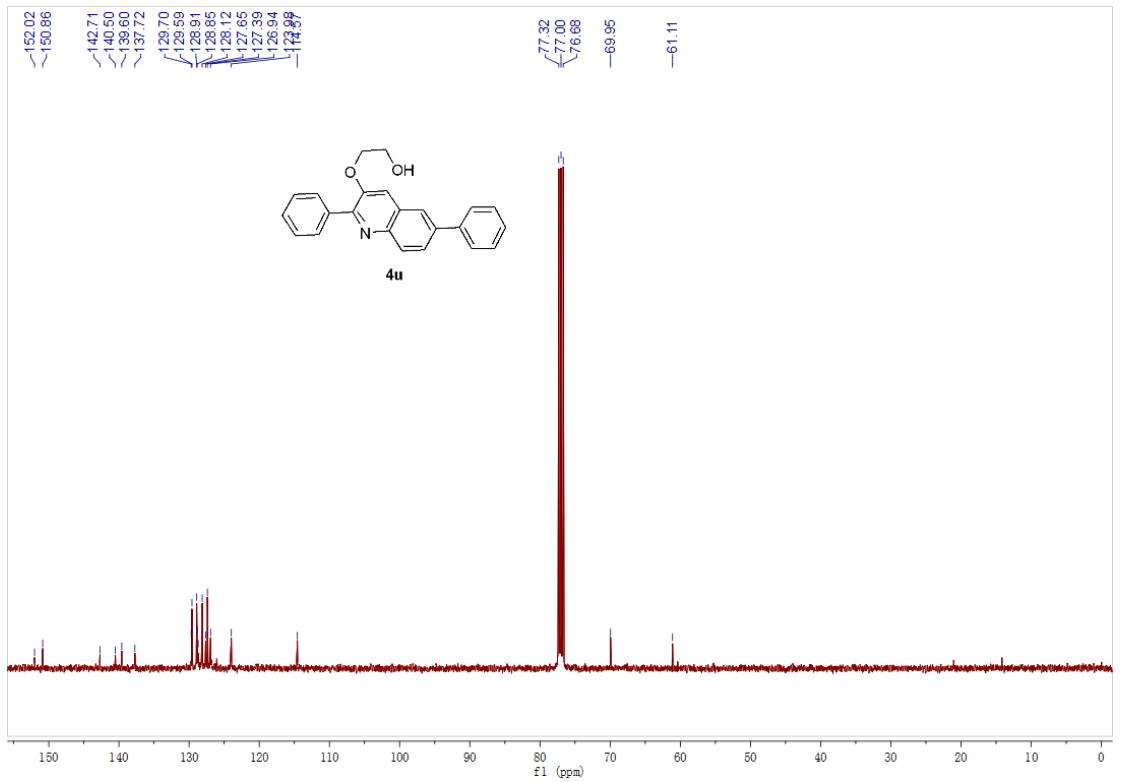

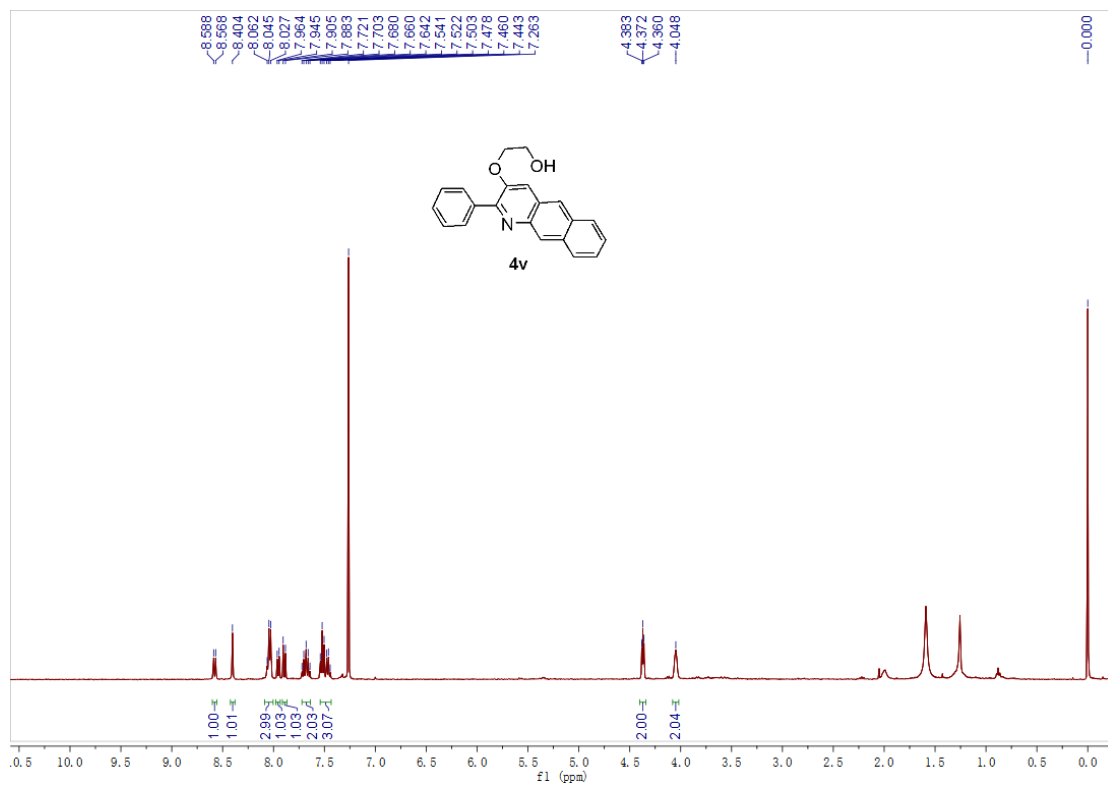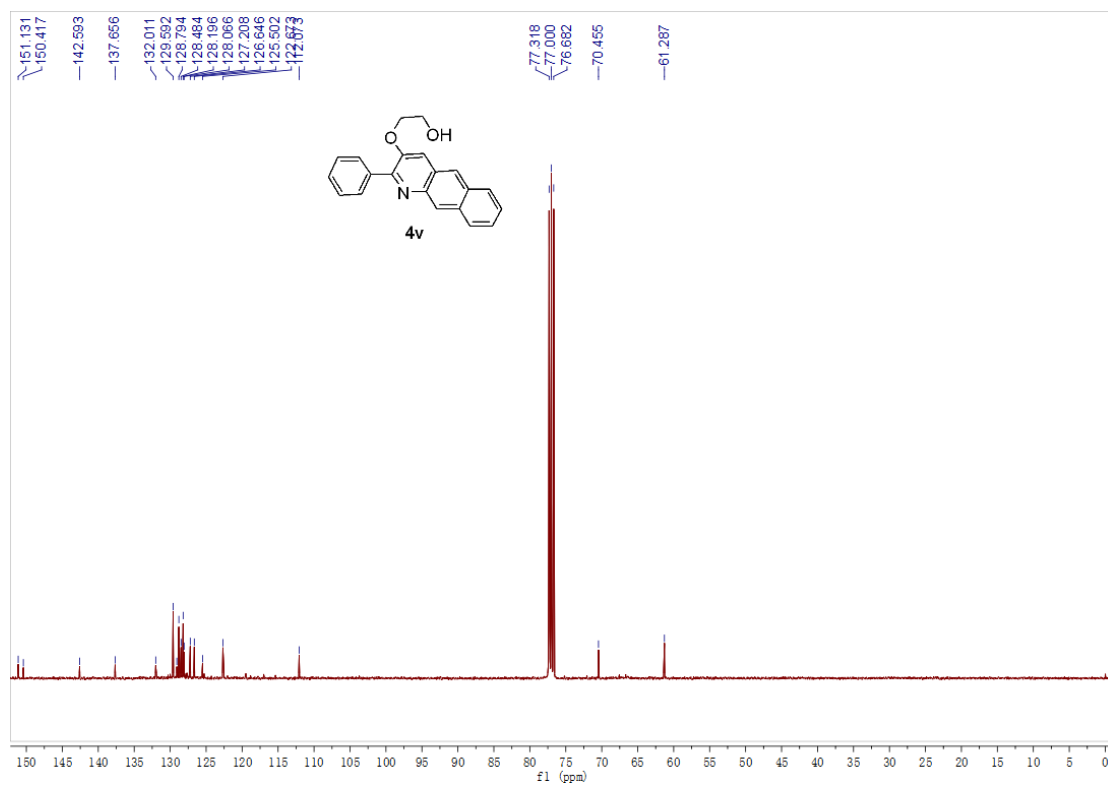

Supplement: d1nj05082f1.pdf [file d1nj05082f1.pdf]
